# Supplementary material for: Protecting-group-free synthesis of clevudine (l-FMAU), a treatment of the hepatitis B virus
Source: Royal Society of Chemistry journal article supplement (doi:10.1039/d2ob01814d), 2022-01-01
Supplement: d2ob01814d1.pdf [file d2ob01814d1.pdf]

# Protecting-Group-Free Synthesis of Clevudine (L-FMAU), a Treatment of Hepatitis B Virus

Thomas Tremblay, Jessica Alcée, Denis Giguère\*

*Département de Chimie, 1045 av. De la Médecine, Université Laval, Québec City, Qc, Canada G1V 0A6,  
PROTEO  
E-mail: denis.giguere@chm.ulaval.ca*

|                                                                     |    |
|---------------------------------------------------------------------|----|
| <b>I. Experimental Section</b> .....                                | 2  |
| <b>General Methods</b> .....                                        | 2  |
| <b>General Procedures</b> .....                                     | 3  |
| <b>Optimisation of the pyranose-to-furanose isomerization</b> ..... | 5  |
| <b>II. NMR spectra of compounds</b> .....                           | 14 |
| <b>III. References</b> .....                                        | 36 |

## I. Experimental Section

### General Methods

All reactions were carried out under an argon atmosphere with dry solvents under anhydrous conditions, unless otherwise noted. Methylene chloride ( $\text{CH}_2\text{Cl}_2$ ) was purified using a Vacuum Atmospheres Inc. Solvent Purification System. Yields refer to chromatographically and spectroscopically ( $^1\text{H}$  NMR) homogeneous materials, unless otherwise stated. Reagents were purchased at the highest commercial quality available and used without further purification, unless otherwise stated. Reactions were monitored by thin-layer chromatography (TLC) carried out on 0.25 mm E. Merck silica gel plates (60F-254) using UV light as visualizing agent and charring with a solution of 3 g of PhOH and 5 mL of  $\text{H}_2\text{SO}_4$  in 100 mL of EtOH, followed by heating with a heatgun. SiliaFlash® P60 40-63  $\mu\text{m}$  (230-400 mesh) was used for flash column chromatography. NMR spectra were recorded with an Agilent DD2 500 MHz spectrometer and calibrated using residual undeuterated solvent ( $\text{CDCl}_3$ :  $^1\text{H}$   $\delta$  = 7.26 ppm,  $^{13}\text{C}$   $\delta$  = 77.16 ppm; acetone- $d_6$ :  $^1\text{H}$   $\delta$  = 2.05 ppm,  $^{13}\text{C}$   $\delta$  = 29.84 ppm; methanol- $d_4$ :  $^1\text{H}$   $\delta$  = 3.31 ppm,  $^{13}\text{C}$   $\delta$  = 49.00 ppm) as an internal reference. Coupling constants ( $J$ ) are reported in Hertz (Hz), and the following abbreviations were used to designate multiplicities: s = singlet, d = doublet, t = triplet, q = quartet, p = quintet, m = multiplet, br = broad. Assignments of NMR signals were made by homonuclear (COSY) and heteronuclear (HSQC, HMBC, HOESY,  $^{19}\text{F}$ ) two-dimensional correlation spectroscopy. Infrared spectra were recorded using an ABB Bomem MB-Series Arid Zone FT-IR MB-155 Spectrometer. High resolution mass spectra (HRMS) were measured with an Agilent 6210 LC Time of Flight mass spectrometer in electrospray mode. Either protonated molecular ions  $[\text{M} + n\text{H}]^{n+}$ , sodium adducts  $[\text{M} + \text{Na}]^+$  or ammonium adducts  $[\text{M} + \text{NH}_4]^+$  were used for empirical formula confirmation. Optical rotations were measured with a JASCO DIP-360 digital polarimeter, and are reported in units of  $10^{-1}$  ( $\text{deg cm}^2 \text{g}^{-1}$ ).

## General Procedures

### General Procedure I: Bromination of anomeric position

To a stirred solution of carbohydrate (1 equiv.) at 0 °C in CH<sub>2</sub>Cl<sub>2</sub> (0.16 M) was added HBr/AcOH 33 wt% (0.32 M). The mixture was warmed to room temperature and stirred for the indicated amount of time. Then, the solution was poured in an ice-cold saturated aqueous NaHCO<sub>3</sub> solution. The aqueous phase was extracted 3 times with CH<sub>2</sub>Cl<sub>2</sub>. The organic phase was finally washed with a saturated aqueous NaCl solution, dried over Na<sub>2</sub>SO<sub>4</sub>, filtered, and concentrated under reduced pressure to give anomeric bromine.

### General Procedure II: Glycosylation with bis(trimethylsilyl)thymine

**Solution A :** To a solution of thymine (3 equiv.) and ammonium sulfate (0.3 equiv.) in anhydrous CHCl<sub>3</sub> was added HMDS (9 equiv.). The solution was heated at 125 °C in a sealed tube for 16 hours.

**Solution B :** The glycosyl bromide (1 equiv.) was dissolved in anhydrous CHCl<sub>3</sub> under N<sub>2</sub> atmosphere. The solution **A** was added to the solution **B** and the resulting solution was heated at 80 °C for 24 hours.

**Workup for protected compound:** The mixture was cooled to room temperature and ice was added to the solution. CHCl<sub>3</sub> and cold water were added and the aqueous phase was extracted 3 times with CHCl<sub>3</sub>. The organic phase was washed with a cold saturated NaHCO<sub>3</sub> solution, cold saturated NaCl solution, dried over Na<sub>2</sub>SO<sub>4</sub> and concentrated.

**Workup for protected-group free compound:** The mixture was cooled to room temperature then methanol was added and the resulting mixture was stirred for 1 h at this temperature. The solution was filtered under Celite® and washed with methanol. The solvents were evaporated under reduce pressure.

### **General Procedure III: Deprotection of ester protecting group**

Protected carbohydrate was solubilized in a solution of 7 N  $\text{NH}_3/\text{MeOH}$  (0.09 M). The resulting solution was stirred 24 h at room temperature. The solution was evaporated to dryness, coevaporated 3 times with EtOAc and finally triturated with EtOAc (3 times),  $\text{CH}_2\text{Cl}_2$  (3 times) and dried.

### **General Procedure IV: Oxidative cleavage and aldehyde reduction**

To a stirred solution of diol (1 equiv.) in methanol/water (0.013 M, 1:1) was added  $\text{NaIO}_4$  (1.5 equiv.) at room temperature. The mixture was stirred for 2 h in the dark. After this time,  $\text{NaBH}_4$  (1.75 equiv.) was added and the mixture was stirred another 2 h in the dark and then neutralized to  $\text{pH} \approx 7$  with an acidic resin (Amberlite IR-120). The mixture was filtered and concentrated under reduced pressure.



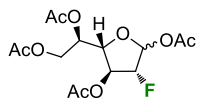

### 1,3,5,6-Tetra-*O*-acetyl-2-deoxy-2-fluoro- $\alpha/\beta$ -D-galactofuranose (**12**).

2-deoxy-2-fluoro-D-galactopyranose **11** (1.56 g, 4.44 mmol) was solubilized in pyridine (11.70 mL) and heated at 110 °C for 2 h. Then, acetic anhydride (7.55 mL, 79.92 mmol, 18 equiv.) was added dropwise at this temperature. The mixture was stirred an additional 1.5 h at 110 °C. After this time, the mixture was cooled to room temperature, concentrated under reduced pressure and coevaporated 3 times with toluene. The residue was purified using flash column chromatography (silica gel, EtOAc/Hexanes, 3:14 to 1:1) to give an anomeric mixture ( $\alpha/\beta = 1:3$ ) of **12** as a colorless oil (381.2 mg, 1.09 mmol, 25 % yield). The spectroscopic data derived from compound **12** match those reported in the literature.<sup>1</sup>

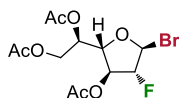

### 3,5,6-Tri-*O*-acetyl-2-deoxy-2-fluoro- $\beta$ -D-galactofuranosyl bromide (**17**).

Synthesized according to general procedure I, starting from **12** (46.0 mg, 0.1313 mmol) to give **17** ( $\alpha/\beta = >1:20$ ) as a yellowish oil;  $R_f = 0.42$  (silica, EtOAc/Hexanes, 1:2);  $[\alpha]_D^{25} = -117.3$  (c 0.4,  $\text{CHCl}_3$ ); IR (ATR, NaCl)  $\nu$  2920, 2854, 1727, 1372, 1214, 1091, 681  $\text{cm}^{-1}$ ;  $^1\text{H}$  NMR (500 MHz,  $\text{CDCl}_3$ )  $\delta$  6.50 (dd,  $^3J_{\text{H1-F2}} = 12.4$  Hz,  $^3J_{\text{H1-H2}} = 0.9$  Hz, 1H, H1), 5.52 (ddd,  $^3J_{\text{H5-H6b}} = 6.9$  Hz,  $^3J_{\text{H5-H6a}} = 4.8$  Hz,  $^3J_{\text{H5-H4}} = 3.3$  Hz, 1H, H5), 5.34 (ddd,  $^2J_{\text{H2-F2}} = 50.2$  Hz,  $^3J_{\text{H2-H3}} = 1.2$  Hz,  $^3J_{\text{H2-H1}} = 0.9$  Hz, 1H, H2), 5.05 (ddd,  $^3J_{\text{H3-F2}} = 22.5$  Hz,  $^3J_{\text{H3-H4}} = 4.9$  Hz,  $^3J_{\text{H3-H2}} = 1.2$  Hz, 1H, H3), 4.54 (ddd,  $^3J_{\text{H4-H3}} = 4.9$  Hz,  $^3J_{\text{H4-H5}} = 3.3$  Hz,  $^4J_{\text{H4-F2}} = 0.9$  Hz, 1H, H4), 4.30 (dd,  $^2J_{\text{H6a-H6b}} = 11.8$  Hz,  $^3J_{\text{H6a-H5}} = 4.8$  Hz, 1H, H6a), 4.20 (dd,  $^2J_{\text{H6b-H6a}} = 11.8$  Hz,  $^3J_{\text{H6b-H5}} = 7.0$  Hz, 1H, H6b), 2.16 (s, 3H,  $\text{COCH}_3$ ), 2.10 (s, 3H,  $\text{COCH}_3$ ), 2.06 (s, 3H,  $\text{COCH}_3$ ) ppm;  $^{13}\text{C}$  NMR (126 MHz,  $\text{CDCl}_3$ )  $\delta$  170.6, 170.2, 170.0 (3C, 3  $\times$  CO), 100.5 (d,  $^1J_{\text{C2-F2}} = 192.7$  Hz, 1C, C2), 87.3 (d,  $^2J_{\text{C1-F2}} = 32.3$  Hz, 1C, C1), 84.1 (d,  $^3J_{\text{C4-F2}} = 1.0$  Hz, C1, C4), 75.9 (d,  $^2J_{\text{C3-F2}} = 31.1$  Hz, 1C, C3), 68.6 (1C, C5), 62.4 (1C, C6), 20.82, 20.78, 20.76 (3C, 3  $\times$   $\text{COCH}_3$ ) ppm;  $^{19}\text{F}$  NMR (470 MHz,  $\text{CDCl}_3$ )  $\delta$  -166.18 (ddd,  $^2J_{\text{F2-H2}} = 50.2$

Hz,  $^3J_{F2-H3} = 22.3$  Hz,  $^3J_{F2-H1} = 12.4$  Hz, 1F, F2) ppm; HRMS (ESI) m/z : [M + H]<sup>+</sup> calcd for C<sub>12</sub>H<sub>20</sub>BrFNO<sub>7</sub><sup>+</sup> 388.0402, found 388.0390.

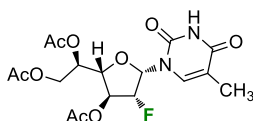

**1-(3',5',6'-Tri-O-acetyl-2'-deoxy-2'-fluoro- $\alpha$ -D-galactofuranosyl)thymine (19).**

Synthesized according to general procedures I and II, starting from **12** (40.0 mg, 0.114 mmol). Purified by flash column chromatography (silica gel, EtOAc/Hexanes, 1:2 to 4:1) to give **19** ( $\alpha/\beta = >20:1$ ) as an amorphous white foam (34.6 mg, 0.083 mmol, 73% yield over two steps).  $R_f = 0.44$  (silica, EtOAc/Hexanes, 3:1);  $[\alpha]_D^{25} = -10.5$  (c 0.5, CHCl<sub>3</sub>); IR (ATR, Diamond)  $\nu$  3046, 2360, 1740, 1693, 1367, 1213, 1037 cm<sup>-1</sup>; <sup>1</sup>H NMR (500 MHz, CDCl<sub>3</sub>)  $\delta$  8.88 (s, 1H, NH), 7.44 (q,  $^4J_{CH=C-CH3a} = ^4J_{CH=C-CH3b} = ^4J_{CH=C-CH3c} = 1.2$  Hz, 1H, CH=C), 6.26 (dd,  $^3J_{H1'-F2'} = 22.4$  Hz,  $^3J_{H1'-H2'} = 2.6$  Hz, 1H, H1'), 5.51 (dt,  $^3J_{H5'-H6b'} = 6.6$  Hz,  $^3J_{H5'-H6a'} = ^3J_{H5'-H4'} = 4.6$  Hz, 1H, H5'), 5.25 (ddd,  $^3J_{H3'-F2'} = 16.5$  Hz,  $^3J_{H3'-H4'} = 2.6$  Hz,  $^3J_{H3'-H2} = 0.9$  Hz 1H, H3'), 5.04 (ddd,  $^2J_{H2'-F2'} = 50.4$  Hz,  $^3J_{H2'-H1'} = 2.6$  Hz,  $^3J_{H2'-H3'} = 0.9$  Hz, 1H, H2'), 4.35 (dd,  $^2J_{H6a'-H6b'} = 11.9$  Hz,  $^3J_{H6a'-H5'} = 4.6$  Hz, 1H, H6a'), 4.28 (dd,  $^2J_{H6b'-H6a'} = 11.9$  Hz,  $^3J_{H6b'-H5'} = 6.7$  Hz, 1H, H6b'), 4.18 (ddd,  $^3J_{H4'-H5'} = 4.6$  Hz,  $^3J_{H4'-H3'} = 2.6$  Hz,  $^4J_{H4'-F2'} = 0.7$  Hz 1H, H4'), 2.15 (s, 3H, COCH<sub>3</sub>), 2.12 (s, 3H, COCH<sub>3</sub>), 2.08 (s, 3H, COCH<sub>3</sub>), 1.95 (d,  $^4J_{CH3-CH=C} = 1.2$  Hz, 3H, CH<sub>3</sub>) ppm; <sup>13</sup>C NMR (126 MHz, CDCl<sub>3</sub>)  $\delta$  170.6, 170.1, 169.5, 163.5, 150.3 (5C, 5  $\times$  CO), 136.7 (d,  $J = 4.2$  Hz, 1C, CH=C), 110.8 (1C, CH=C), 92.2 (d,  $^1J_{C2'-F2'} = 192.8$  Hz, 1C, C2'), 84.4 (d,  $^2J_{C1'-F2'} = 16.1$  Hz, 1C, C1'), 81.8 (1C, C4'), 76.3 (d,  $^2J_{C3'-F2'} = 30.5$  Hz, 1C, C3'), 69.8 (1C, C5'), 62.6 (1C, C6'), 20.9, 20.8, 20.7 (3C, 3  $\times$  COCH<sub>3</sub>), 12.7 (1C, CH<sub>3</sub>) ppm; <sup>19</sup>F NMR (470 MHz, CDCl<sub>3</sub>)  $\delta$  -201.98 (dddd,  $^2J_{F2'-H2'} = 50.4$  Hz,  $^3J_{F2'-H1'} = 22.4$  Hz,  $^3J_{F2'-H3'} = 16.5$  Hz,  $^4J_{F2'-H4'} = 0.7$  Hz, 1F, F2') ppm; HRMS (ESI) m/z : [M + H]<sup>+</sup> calcd for C<sub>17</sub>H<sub>22</sub>FN<sub>2</sub>O<sub>9</sub><sup>+</sup> 417.1304, found 417.1318.

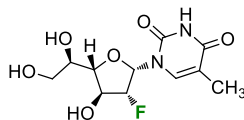

### 1-(2'-Deoxy-2'-fluoro- $\alpha$ -D-galactofuranosyl)thymine (**20**).

Synthesized according to general procedure III, starting from **19** (9.3 mg, 0.022 mmol) to give **20** ( $\alpha/\beta = >20:1$ ) as an amorphous white solid (5.2 mg, 0.018 mmol, 82% yield).  $R_f = 0.29$  (silica, MeOH/CH<sub>2</sub>Cl<sub>2</sub>, 1:9);  $[\alpha]_D^{25} = -18.5$  (c 0.1, CHCl<sub>3</sub>); IR (ATR, NaCl)  $\nu$  3348, 2924, 1693, 1468, 1283, 1028, 785 cm<sup>-1</sup>; <sup>1</sup>H NMR (500 MHz, CD<sub>3</sub>OD)  $\delta$  7.85 (q, <sup>4</sup> $J_{CH=C-CH_3a} =$ <sup>4</sup> $J_{CH=C-CH_3b} =$ <sup>4</sup> $J_{CH=C-CH_3c} = 1.3$  Hz, 1H, CH=C), 6.16 (dd, <sup>3</sup> $J_{H1'-F2'} = 14.3$  Hz, <sup>3</sup> $J_{H1'-H2'} = 4.6$  Hz, 1H, H1'), 5.03 (ddd, <sup>2</sup> $J_{H2'-F2'} = 53.1$  Hz, <sup>3</sup> $J_{H2'-H1'} = 4.6$  Hz, <sup>3</sup> $J_{H2'-H3'} = 3.4$  Hz, 1H, H2'), 4.45 (ddd, <sup>3</sup> $J_{H3'-F2'} = 22.5$  Hz, <sup>3</sup> $J_{H3'-H4'} = 6.3$  Hz, <sup>3</sup> $J_{H3'-H2'} = 3.4$  Hz, 1H, H3'), 3.87 – 3.81 (m, 2H, H4', H5'), 3.68 (s, 1H, H6a'), 3.67 (s, 1H, H6b'), 1.88 (d, <sup>4</sup> $J_{CH_3-CH=C} = 1.2$  Hz, 3H, CH<sub>3</sub>) ppm; <sup>13</sup>C NMR (126 MHz, CD<sub>3</sub>OD)  $\delta$  166.3, 152.1 (2C, 2  $\times$  CO), 139.2 (d,  $J = 2.8$  Hz, 1C, CH=C), 110.6 (1C, CH=C), 97.4 (d, <sup>1</sup> $J_{C2'-F2'} = 192.9$  Hz, 1C, C2'), 84.2 (d, <sup>2</sup> $J_{C1'-F2'} = 17.4$  Hz, 1C, C1'), 83.3 (d, <sup>3</sup> $J_{C4'-F2'} = 5.8$  Hz, 1C, C4'), 75.1 (d, <sup>2</sup> $J_{C3'-F2'} = 25.2$  Hz, 1C, C3'), 71.4 (1C, C5'), 64.2 (1C, C6'), 12.3 (1C, CH<sub>3</sub>) ppm; <sup>19</sup>F NMR (470 MHz, CD<sub>3</sub>OD)  $\delta$  -200.49 (ddd, <sup>2</sup> $J_{F2'-H2'} = 53.2$  Hz, <sup>3</sup> $J_{F2'-H3'} = 22.6$  Hz, <sup>3</sup> $J_{F2'-H1'} = 14.3$  Hz, 1F, F2') ppm; HRMS (ESI)  $m/z$  :  $[M + H]^+$  calcd for C<sub>11</sub>H<sub>16</sub>FN<sub>2</sub>O<sub>6</sub><sup>+</sup> 291.0987, found 291.0988.

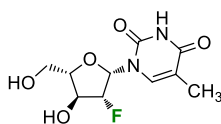

### 1-(2'-Deoxy-2'-fluoro- $\beta$ -L-arabinofuranosyl)thymine (**1**).

From compound **20**: Synthesized according to general procedure IV, starting from **20** (20.3 mg, 0.070 mmol). Purified by flash column chromatography (silica gel, MeOH/DCM, 1:19 to 1:9) to give **1** ( $\alpha/\beta = >1:20$ ) as an amorphous white solid (16.7 mg, 0.0642 mmol, 92% yield over two steps). The spectroscopic data derived from compound **1** match those reported in the literature.<sup>2</sup>



From compound **26**: Synthesized according to general procedure III, starting from **26** (23.2 mg, 0.067 mmol) to give **1** ( $\alpha/\beta = >1:20$ ) as an amorphous white solid (13.5 mg, 0.052 mmol, 77% yield).

From compound **9**: Synthesized according to general procedures I and II, starting from **9** (10.1 mg, 0.061 mmol). Purified by flash column chromatography (silica gel, MeOH/DCM, 1:19 to 1:9) to give an anomeric mixture ( $\alpha/\beta$ , 1:4) of **1** as an amorphous white solid (4.1 mg, 0.0158 mmol, 26% yield over two steps).

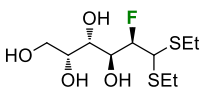

### 2-Deoxy-2-fluoro-D-galactopyranose diethyl dithioacetal (**22**).

2-deoxy-2-fluoro-D-galactopyranose **11** (1.03 g, 5.65 mmol) was solubilized in HCl 37% (2.74 mL). The solution was cooled to 0 °C and ethanethiol (1.22 mL, 16.95 mmol, 3 equiv) was added. The mixture was stirred 1 h at 0 °C. The acid was neutralized to pH  $\approx$  7 with the addition of 1M NaOH solution dropwise at 0 °C. The solvents were concentrated under an air flow. Acetone (50 mL) was added to the crude material. The solution was filtered to remove NaCl salt and concentrated to offer **22** as an amorphous white solid (1.59 g, 5.51 mmol, 98% yield).  $R_f = 0.66$  (silica, MeOH/CH<sub>2</sub>Cl<sub>2</sub>, 1:9);  $[\alpha]_D^{25} = -10.6$  (c 0.2, Acetone); IR (ATR, Diamond)  $\nu$  3288, 2955, 1294, 1105, 1043, 758 cm<sup>-1</sup>; <sup>1</sup>H NMR (500 MHz, Acetone-*d*<sub>6</sub>)  $\delta$  4.76 (ddd, <sup>2</sup>*J*<sub>H2-F2</sub> = 46.4 Hz, <sup>3</sup>*J*<sub>H2-H1</sub> = 9.9 Hz, <sup>3</sup>*J*<sub>H2-H3</sub> = 1.2 Hz, 1H, H2), 4.35 (dd, <sup>3</sup>*J*<sub>H1-H2</sub> = 9.9 Hz, <sup>3</sup>*J*<sub>H1-F2</sub> = 7.4 Hz, 1H, H1), 4.23 – 4.12 (m, 2H, H3, OH3), 3.96 (qd, <sup>3</sup>*J*<sub>H5-H4</sub> = <sup>3</sup>*J*<sub>H5-H6a</sub> = <sup>3</sup>*J*<sub>H5-H6b</sub> = 6.1 Hz, <sup>3</sup>*J*<sub>H5-OH5</sub> = 1.5 Hz, 1H, H5), 3.86 (t, <sup>3</sup>*J*<sub>OH6-H6a</sub> = <sup>3</sup>*J*<sub>OH6-H6b</sub> = 5.6 Hz, 1H, OH6), 3.78 (d, <sup>3</sup>*J*<sub>OH5-H5</sub> = 1.4 Hz, 1H, OH5), 3.77 (s, 1H, OH4), 3.70 – 3.64 (m, 3H, H4, H6a, H6b), 2.80 – 2.66 (m, 4H, 2  $\times$  SCH<sub>2</sub>), 1.24 (t, <sup>3</sup>*J*<sub>CH3-SCH2a</sub> = <sup>3</sup>*J*<sub>CH3-SCH2b</sub> = 7.5 Hz, 6H, 2  $\times$  CH<sub>3</sub>) ppm; <sup>13</sup>C NMR (126 MHz, Acetone-*d*<sub>6</sub>)  $\delta$  94.4 (d, <sup>1</sup>*J*<sub>C2-F2</sub> = 182.9 Hz, 1C, C2), 71.0 (d, <sup>3</sup>*J*<sub>C4-F2</sub> = 3.9 Hz, 1C, C4), 70.9 (1C, C5), 70.3 (d, <sup>2</sup>*J*<sub>C3-F2</sub> = 19.1 Hz, 1C, C3), 64.9 (1C, C6), 51.6 (d, <sup>2</sup>*J*<sub>C1-F2</sub> = 21.9 Hz, 1C, C1), 25.6, 24.9 (2C, 2  $\times$  SCH<sub>2</sub>), 14.84, 14.79 (2C, 2  $\times$  CH<sub>3</sub>) ppm; <sup>19</sup>F NMR (470 MHz, Acetone-*d*<sub>6</sub>)  $\delta$  -195.82 (dddd, <sup>2</sup>*J*<sub>F2</sub>

$_{H2} = 46.4$  Hz,  $^3J_{F2-H3} = 26.5$  Hz, 11.9,  $^3J_{F2-H1} = 7.4$  Hz, 1F, F2) ppm; HRMS (ESI)  $m/z$  : [M + H]<sup>+</sup> calcd for C<sub>10</sub>H<sub>21</sub>FO<sub>4</sub>Na<sup>+</sup> 311.0763, found 311.0766.

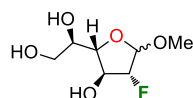

### Methyl 2-deoxy-2-fluoro- $\alpha/\beta$ -D-galactofuranoside (**10**).

To a stirred solution of compound **22** (1.59 g, 5.51 mmol) in methanol (46 mL) was added iodine (5.87 g, 23.14 mmol, 4.2 equiv). After stirred 2 h at room temperature, solid NaHCO<sub>3</sub> (56.77 g) was added and the reaction was stirred 5 minutes. Then, solid Na<sub>2</sub>S<sub>2</sub>O<sub>3</sub> (45.54 g) was added to quench the excess of iodine. The mixture was stirred 10 minutes before the addition of AgNO<sub>3</sub> (15.75 g). The resulting mixture was stirred for another 1 hour, filtrated under Celite® and concentrated under reduce pressure. The crude solid was purified by flash column chromatography (silica gel, MeOH/CH<sub>2</sub>Cl<sub>2</sub>, 1:49 to 1:9) to give an anomeric mixture ( $\alpha/\beta = 1:12$ ) of **10** as a colorless oil (853.8 mg, 4.35 mmol, 79 % yield).  $R_f = 0.51$  (silica, MeOH/CH<sub>2</sub>Cl<sub>2</sub>, 1:9);  $[\alpha]_D^{25} = -131.3$  (c 0.5, MeOH); IR (ATR, Diamond)  $\nu$  3375, 2937, 1194, 1101, 1028, 982, 947 cm<sup>-1</sup>; Spectral data for the  $\beta$  anomer (**10 $\beta$** ): <sup>1</sup>H NMR (500 MHz, CDCl<sub>3</sub>)  $\delta$  5.07 (dd,  $^3J_{H1-F2} = 10.1$  Hz,  $^3J_{H1-H2} = 0.6$  Hz, 1H, H1), 4.86 (ddd,  $^2J_{H2-F2} = 50.8$  Hz,  $^3J_{H2-H3} = 1.4$  Hz,  $^3J_{H2-H1} = 0.6$  Hz, 1H, H2), 4.27 (dddd,  $^3J_{H3-F2} = 22.4$  Hz,  $^3J_{H3-OH3} = 7.5$  Hz,  $^3J_{H3-H4} = 5.1$  Hz,  $^3J_{H3-H2} = 1.4$  Hz, 1H, H3), 4.04 (t,  $^3J_{H4-H3} = ^3J_{H4-H5} = 5.0$  Hz, 1H, H4), 3.85 (dq,  $^3J_{H5-H4} = 5.0$  Hz,  $^3J_{H5-OH5} = ^3J_{H5-H6a} = ^3J_{H5-H6b} = 4.9$  Hz, 1H, H5), 3.82 – 3.74 (m, 2H, 1H, H6a, H6b), 3.42 (s, 3H, OCH<sub>3</sub>), 2.71 (d,  $J = 7.5$  Hz, 1H, OH3), 2.55 (d,  $^3J_{OH6-H6} = 4.9$  Hz, 1H, OH5), 2.26 (s, 1H, OH6) ppm; <sup>13</sup>C NMR (126 MHz, CDCl<sub>3</sub>)  $\delta$  106.2 (d,  $^2J_{C1-F2} = 34.5$  Hz, 1C, C1), 99.5 (d,  $^1J_{C2-F2} = 182.2$  Hz, 1C, C2), 85.8 (d,  $^3J_{C4-F2} = 2.8$  Hz, 1C, C4), 76.3 (d,  $^2J_{C3-F2} = 26.2$  Hz, 1C, C3), 71.4 (1C, C5), 64.2 (1C, C6), 55.2 (1C, CH<sub>3</sub>) ppm; <sup>19</sup>F NMR (470 MHz, CDCl<sub>3</sub>)  $\delta$  -191.11 (ddd,  $^2J_{F2-H2} = 50.8$  Hz,  $^3J_{F2-H3} = 22.3$  Hz,  $^3J_{F2-H1} = 10.1$  Hz, 1F, F2) ppm; HRMS (ESI)  $m/z$  : [M + H]<sup>+</sup> calcd for C<sub>7</sub>H<sub>13</sub>FO<sub>5</sub>Na<sup>+</sup> 219.0645, found 219.0652.

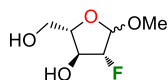

### Methyl 2-deoxy-2-fluoro- $\alpha/\beta$ -L-arabinofuranoside (**9**).

Synthesized according to general procedure IV, starting from **10** (832.4 mg, 4.24 mmol). Purified by flash column chromatography (silica gel, MeOH/DCM, 1:49 to 3:47) to give an anomeric mixture ( $\alpha/\beta = 10:1$ ) of **9** as a colorless oil (669.2 mg, 4.03 mmol, 95% yield).  $R_{f\alpha} = 0.48$  (silica, MeOH/CH<sub>2</sub>Cl<sub>2</sub>, 1:19);  $R_{f\beta} = 0.42$  (silica, MeOH/CH<sub>2</sub>Cl<sub>2</sub>, 1:19);  $[\alpha]_D^{25} = -109.5$  (c 0.6, CHCl<sub>3</sub>); IR (ATR, Diamond)  $\nu$  3369, 2934, 1194, 1086, 1036, 982 cm<sup>-1</sup>; Spectral data for the  $\alpha$  isomer (**9 $\alpha$** ): <sup>1</sup>H NMR (500 MHz, CDCl<sub>3</sub>)  $\delta$  5.05 (dd, <sup>3</sup> $J_{H1-F2} = 10.2$  Hz, <sup>3</sup> $J_{H1-H2} = 1.3$  Hz, 1H, H1), 4.84 (dt, <sup>2</sup> $J_{H2-F2} = 50.5$  Hz, <sup>3</sup> $J_{H2-H1} = 3J_{H2-H3} = 1.3$  Hz, 1H, H2), 4.19 (dddd, <sup>3</sup> $J_{H3-F2} = 22.2$  Hz, <sup>3</sup> $J_{H3-OH3} = 7.7$  Hz, <sup>3</sup> $J_{H3-H4} = 4.8$  Hz, <sup>3</sup> $J_{H3-H2} = 1.3$  Hz, 1H, H3), 4.06 (qd, <sup>3</sup> $J_{H4-H5a} = 3J_{H4-H5b} = 3J_{H4-H3} = 4.7$  Hz, <sup>4</sup> $J_{H4-F2} = 1.9$  Hz, 1H, H4), 3.83 (ddd, <sup>2</sup> $J_{H5a-H5b} = 11.9$  Hz, <sup>3</sup> $J_{H5a-OH5} = 6.4$  Hz, <sup>3</sup> $J_{H5a-H4} = 4.6$  Hz, 1H, H5a), 3.74 (ddd, <sup>2</sup> $J_{H5b-H5a} = 11.9$  Hz, <sup>3</sup> $J_{H5b-OH5} = 6.4$  Hz, <sup>3</sup> $J_{H5b-H4} = 4.8$  Hz, 1H, H5b), 3.41 (s, 3H, OCH<sub>3</sub>), 3.32 (dd, <sup>3</sup> $J_{OH3-H3} = 7.7$  Hz, <sup>4</sup> $J_{OH3-F2} = 2.1$  Hz, 1H, OH3), 2.67 (t, <sup>3</sup> $J_{OH5-H5a} = 3J_{OH5-H5b} = 6.4$  Hz, 1H, OH5) ppm; <sup>13</sup>C NMR (126 MHz, CDCl<sub>3</sub>)  $\delta$  106.2 (d, <sup>2</sup> $J_{C1-F2} = 34.4$  Hz, 1C, C1), 99.6 (d, <sup>1</sup> $J_{C2-F2} = 181.8$  Hz, 1C, C2), 85.2 (d, <sup>3</sup> $J_{C4-F2} = 2.6$  Hz, 1C, C4), 75.5 (d, <sup>2</sup> $J_{C3-F2} = 25.9$  Hz, 1C, C3), 62.1 (1C, C5), 55.1 (1C, OCH<sub>3</sub>) ppm; <sup>19</sup>F NMR (470 MHz, CDCl<sub>3</sub>)  $\delta$  -191.10 (ddd, <sup>2</sup> $J_{F2-H2} = 50.5$  Hz, <sup>3</sup> $J_{F2-H3} = 22.1$  Hz, <sup>3</sup> $J_{F2-H1} = 10.1$  Hz, 1F, F2) ppm; HRMS (ESI)  $m/z$  : [M + H]<sup>+</sup> calcd for C<sub>6</sub>H<sub>11</sub>FO<sub>4</sub>Na<sup>+</sup> 189.0539, found 189.0536.

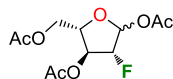

### 1,3,5-Tri-*O*-acetyl-2-deoxy-2-fluoro- $\alpha/\beta$ -L-arabinofuranose (**24**).

Compound **9** (103.6 mg, 0.624 mmol) was solubilized in a mixture of Ac<sub>2</sub>O and AcOH (1.93 mL, 20:1) and the resulting solution was heated at 100 °C for 2 h. After cooling to room temperature, H<sub>2</sub>SO<sub>4</sub> (20  $\mu$ L, 0.3732 mmol, 0.60 equiv.) was added and the mixture was stirred at room temperature for 2 h. The mixture was dropped in a saturated aqueous NaHCO<sub>3</sub> solution (10 mL). This aqueous phase was extracted with CH<sub>2</sub>Cl<sub>2</sub> (3  $\times$  15 mL),

washed with a saturated aqueous NaHCO<sub>3</sub> solution (30 mL) and a saturated aqueous NaCl solution (30 mL). The organic phase was dried with Na<sub>2</sub>SO<sub>4</sub>, filtered, and concentrated under reduced pressure. The obtained crude was purified by flash column chromatography (silica gel, EtOAc/hexanes, 1:4 → 1:2) to give an anomeric mixture ( $\alpha/\beta = 8:1$ ) of **24** as a colorless oil (157.9 mg, 0.5674 mmol, 91 %).  $R_{f\alpha} = 0.59$  (EtOAc/hexanes, 1:2);  $R_{f\beta} = 0.49$  (EtOAc/hexanes, 1:2); A pure fraction of the  $\alpha$  anomer was used for characterization.  $[\alpha]_D^{25} = -61.5$  (c 0.7, CHCl<sub>3</sub>); IR (ATR, Diamond)  $\nu$  2924, 2853, 1740, 1371, 1213, 1117, 962 cm<sup>-1</sup>; Spectral data for the  $\alpha$  anomer (**24a**): <sup>1</sup>H NMR (500 MHz, CDCl<sub>3</sub>)  $\delta$  6.35 (dd, <sup>3</sup> $J_{H1-F2} = 10.5$  Hz, <sup>3</sup> $J_{H1-H2} = 1.0$  Hz, 1H, H1), 5.15 (ddd, <sup>3</sup> $J_{H3-F2} = 21.5$  Hz, <sup>3</sup> $J_{H3-H4} = 4.3$  Hz, <sup>3</sup> $J_{H3-H2} = 1.0$  Hz, 1H, H3), 5.01 (dt, <sup>2</sup> $J_{H2-F2} = 48.8$  Hz, <sup>3</sup> $J_{H2-H1} = 3J_{H2-H3} = 1.0$  Hz, 1H, H2), 4.42 (dd, <sup>2</sup> $J_{H5a-H5b} = 11.8$  Hz, <sup>3</sup> $J_{H5a-H4} = 3.7$  Hz, 1H, H5a), 4.37 (ddd, <sup>3</sup> $J_{H4-H5b} = 5.1$  Hz, <sup>3</sup> $J_{H4-H3} = 4.3$  Hz, <sup>3</sup> $J_{H4-H5a} = 3.7$  Hz, 1H, H4), 4.25 (dd, <sup>2</sup> $J_{H5b-H5a} = 11.8$  Hz, <sup>3</sup> $J_{H5b-H4} = 5.1$  Hz, 1H, H5b), 2.14 (s, 3H, COCH<sub>3</sub>), 2.11 (s, 3H, COCH<sub>3</sub>), 2.09 (s, 3H, COCH<sub>3</sub>) ppm; <sup>13</sup>C NMR (126 MHz, CDCl<sub>3</sub>)  $\delta$  170.8, 170.0, 169.2 (3C, 3 × COCH<sub>3</sub>), 99.1 (d, <sup>2</sup> $J_{C1-F2} = 37.5$  Hz, 1C, C1), 97.6 (d, <sup>1</sup> $J_{C2-F2} = 184.5$  Hz, 1C, C2), 83.1 (d, <sup>3</sup> $J_{C4-F2} = 1.4$  Hz, 1C, C4), 76.5 (d, <sup>2</sup> $J_{C3-F2} = 30.7$  Hz, 1C, C3), 63.0 (1C, C5), 21.1, 20.84, 20.77 (3C, 3 × COCH<sub>3</sub>) ppm; <sup>19</sup>F NMR (470 MHz, CDCl<sub>3</sub>)  $\delta$  -190.30 (ddd, <sup>2</sup> $J_{F2-H2} = 48.9$  Hz, <sup>3</sup> $J_{F2-H3} = 21.4$  Hz, <sup>3</sup> $J_{F2-H1} = 10.5$  Hz, 1F, F2) ppm; HRMS (ESI)  $m/z$ : [M + NH<sub>4</sub>]<sup>+</sup> calcd for C<sub>11</sub>H<sub>19</sub>FNO<sub>7</sub><sup>+</sup> 296.1140, found 296.1144.

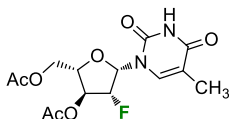

**1-(3',5'-Di-O-acetyl-2'-deoxy-2'-fluoro- $\beta$ -L-arabinofuranosyl)thymine (26).**

Synthesized according to general procedures I and II, starting from **24** (146.6 mg, 0.527 mmol). Purified by flash column chromatography (silica gel, EtOAc/Hexanes, 2:3 to 3:2) to give **26** ( $\alpha/\beta = >1:20$ ) as an amorphous white solid (110.6 mg, 0.321 mmol, 61% yield over two steps).  $R_f = 0.36$  (silica, EtOAc/Hexanes, 4:1);  $[\alpha]_D^{25} = -32.0$  (c 0.5, CHCl<sub>3</sub>); IR (ATR, NaCl)  $\nu$  2360, 1746, 1693, 1368, 1289, 1225 cm<sup>-1</sup>; <sup>1</sup>H NMR (500 MHz, CDCl<sub>3</sub>)  $\delta$  8.87 (s, 1H, NH), 7.33 (dt, <sup>4</sup> $J_{CH=C-CH3a} = 2.3$  Hz, <sup>4</sup> $J_{CH=C-CH3b} = 4J_{CH=C-CH3c} = 1.0$  Hz, 1H,

CH=C), 6.20 (dd,  $^3J_{H1'-F2'} = 22.3$  Hz,  $^3J_{H1'-H2'} = 2.8$  Hz, 1H, H1'), 5.22 (ddd,  $^3J_{H3'-F2'} = 16.6$  Hz,  $^3J_{H3'-H4'} = 2.8$  Hz,  $^3J_{H3'-H2'} = 0.8$  Hz, 1H, H3'), 5.09 (ddd,  $^2J_{H2'-F2'} = 50.2$  Hz,  $^3J_{H2'-H1'} = 2.8$  Hz,  $^3J_{H2'-H3'} = 0.8$  Hz, 1H, H2'), 4.47 (dd,  $^2J_{H5b'-H5a'} = 12.0$  Hz,  $^3J_{H5b'-H4'} = 5.9$  Hz, 1H, H5b'), 4.41 (dd,  $^2J_{H5a'-H5b'} = 12.0$  Hz,  $^3J_{H5a'-H4'} = 3.9$  Hz, 1H, H5a'), 4.22 (ddd,  $^3J_{H4'-H5b'} = 5.9$  Hz,  $^3J_{H4'-H5a'} = 4.0$  Hz,  $^3J_{H4'-H3'} = 2.8$  Hz, 1H, H4'), 2.16 (s, 1H, COCH<sub>3</sub>), 2.12 (s, 1H, COCH<sub>3</sub>), 1.94 (d,  $^4J_{CH3-CH=C} = 1.2$  Hz, 3H, CH<sub>3</sub>) ppm; <sup>13</sup>C NMR (126 MHz, CDCl<sub>3</sub>) δ 170.5, 169.4, 163.4, 150.2 (4C, 4 × CO), 136.3 (d,  $J = 4.2$  Hz, CH=C), 110.6 (1C, CH=C), 92.3 (d,  $^1J_{C2'-F2'} = 191.7$  Hz, 1C, C2'), 84.5 (d,  $^2J_{C1'-F2'} = 16.3$  Hz, 1C, C1'), 81.1 (1C, C4'), 75.9 (d,  $^2J_{C3'-F2'} = 30.4$  Hz, 1C, C3'), 62.6 (1C, C5'), 20.8, 20.6 (2C, 2 × COCH<sub>3</sub>), 12.6 (1C, CH<sub>3</sub>) ppm; <sup>19</sup>F NMR (470 MHz, CDCl<sub>3</sub>) δ -202.08 (ddd,  $^2J_{F2'-H2'} = 50.3$  Hz,  $^3J_{F2'-H1'} = 22.4$  Hz,  $^3J_{F2'-H3'} = 16.7$  Hz, 1F, F2') ppm; HRMS (ESI) m/z: [M + NH<sub>4</sub>]<sup>+</sup> calcd for C<sub>14</sub>H<sub>18</sub>FN<sub>2</sub>O<sub>7</sub><sup>+</sup> 345.1093, found 345.1109.

## II. NMR spectra of compounds

<sup>1</sup>H NMR Spectrum  
(CDCl<sub>3</sub>, 500 MHz)

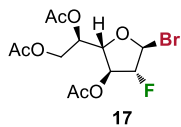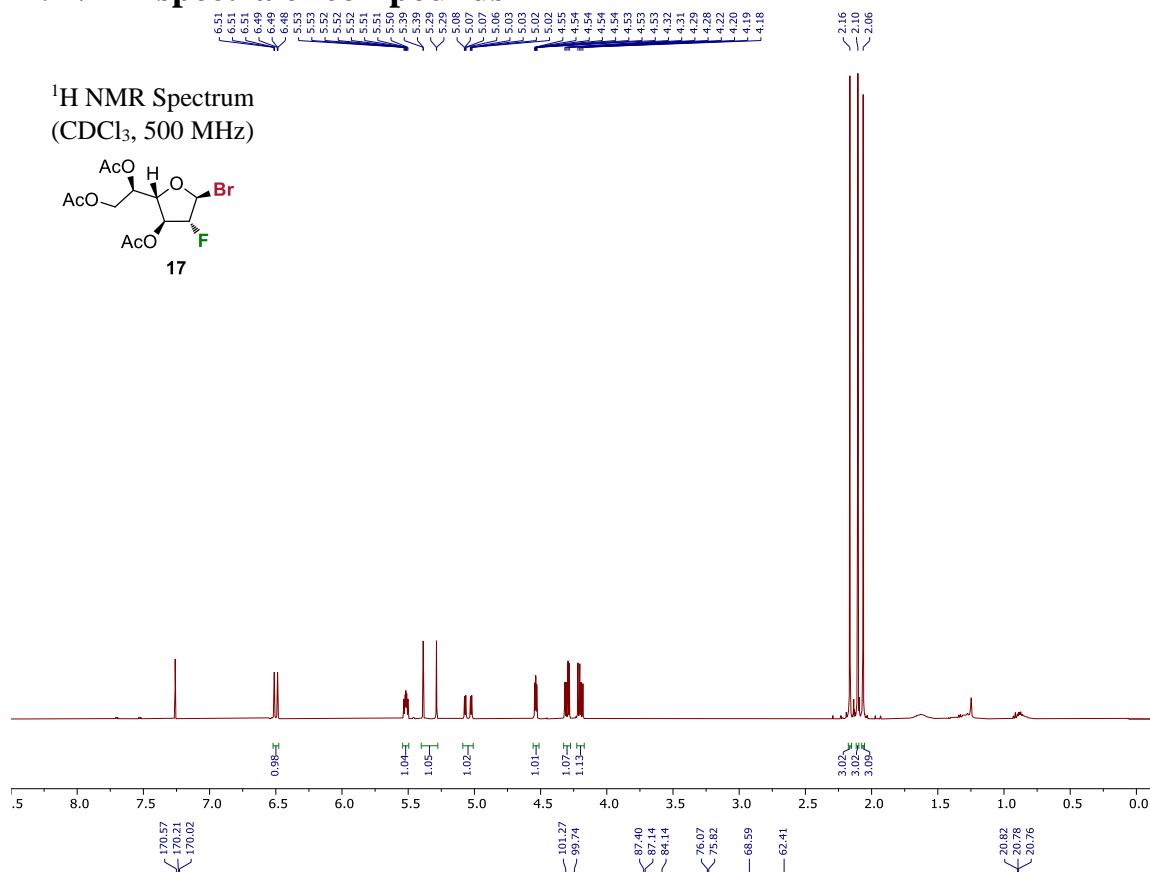

<sup>13</sup>C NMR Spectrum  
(CDCl<sub>3</sub>, 126 MHz)

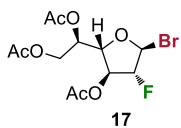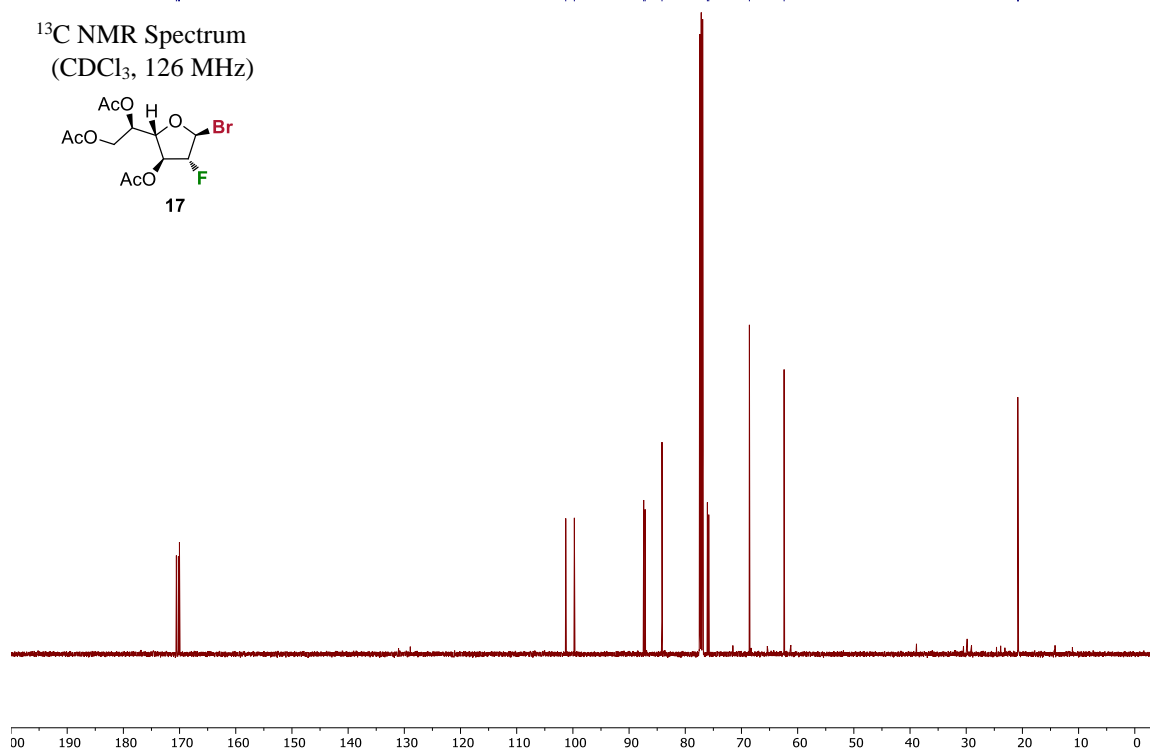

<sup>19</sup>F NMR Spectrum  
(CDCl<sub>3</sub>, 470 MHz)

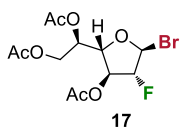

-166.08  
-166.11  
-166.13  
-166.16  
-166.19  
-166.22  
-166.24  
-166.27

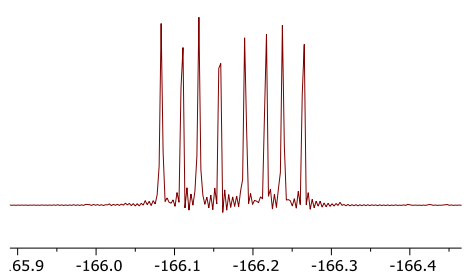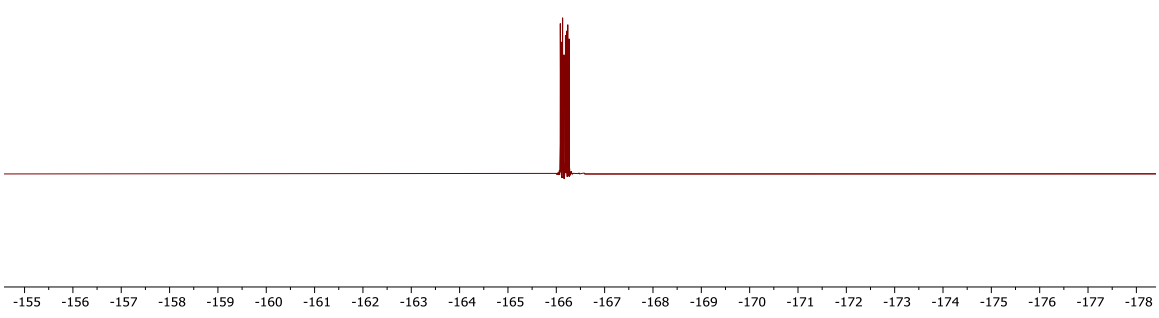

COSY NMR Spectrum

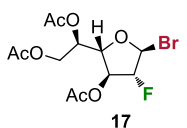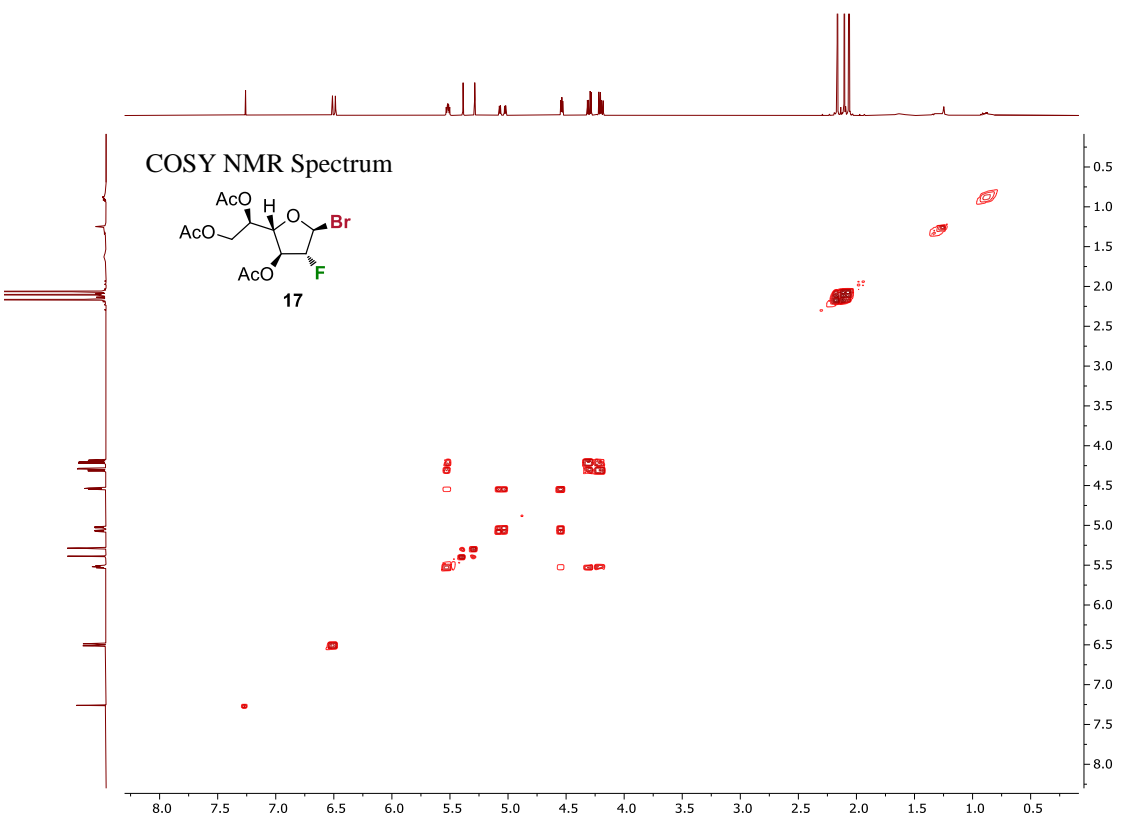

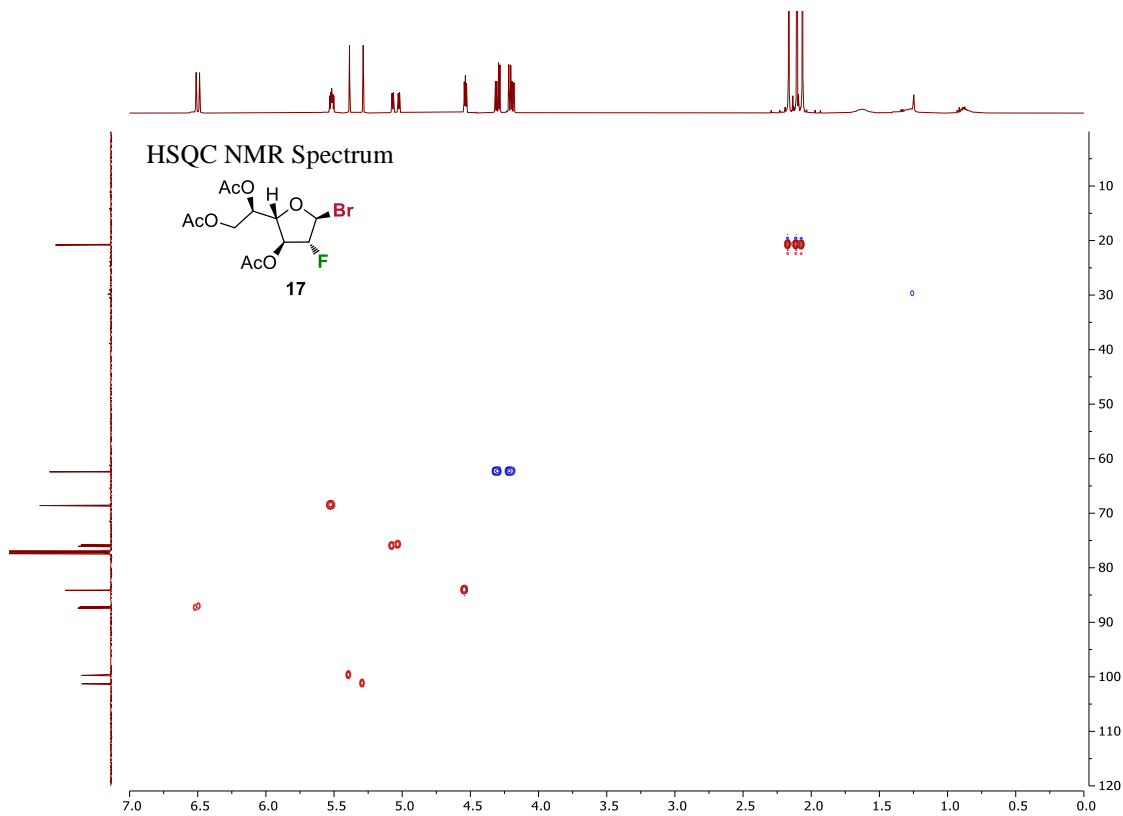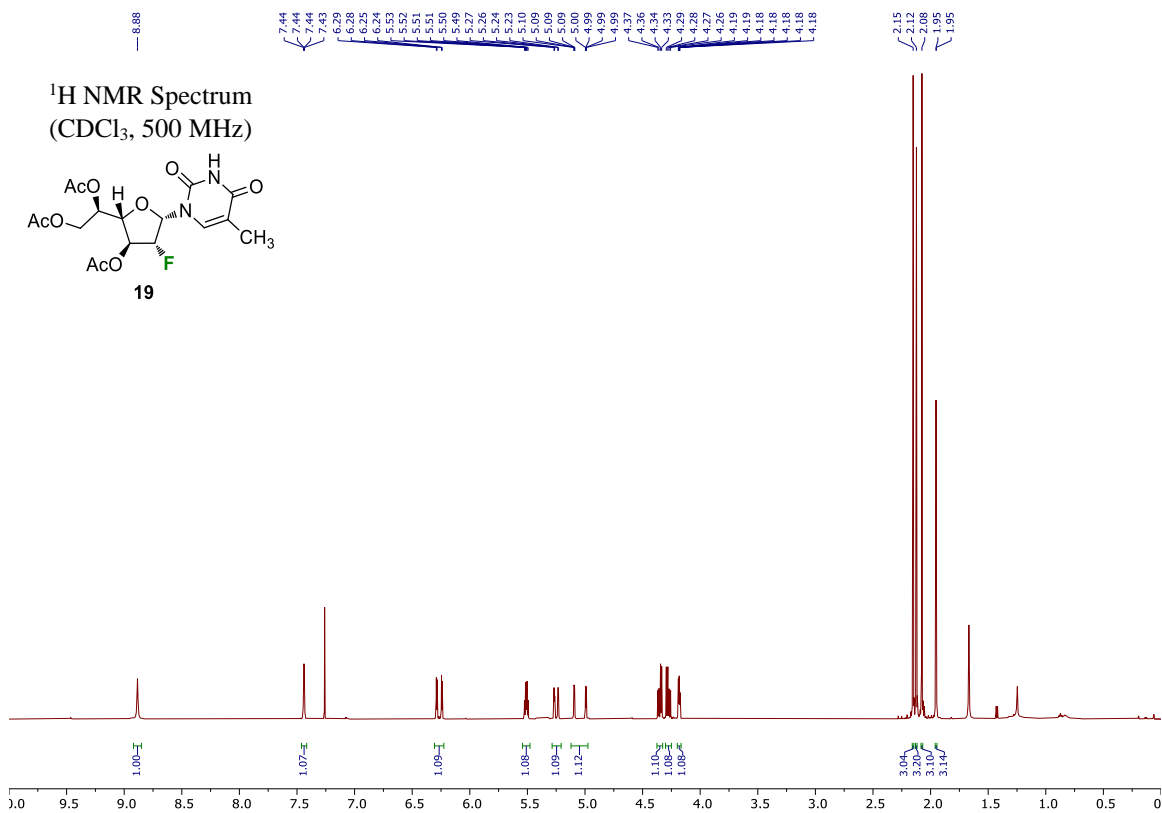



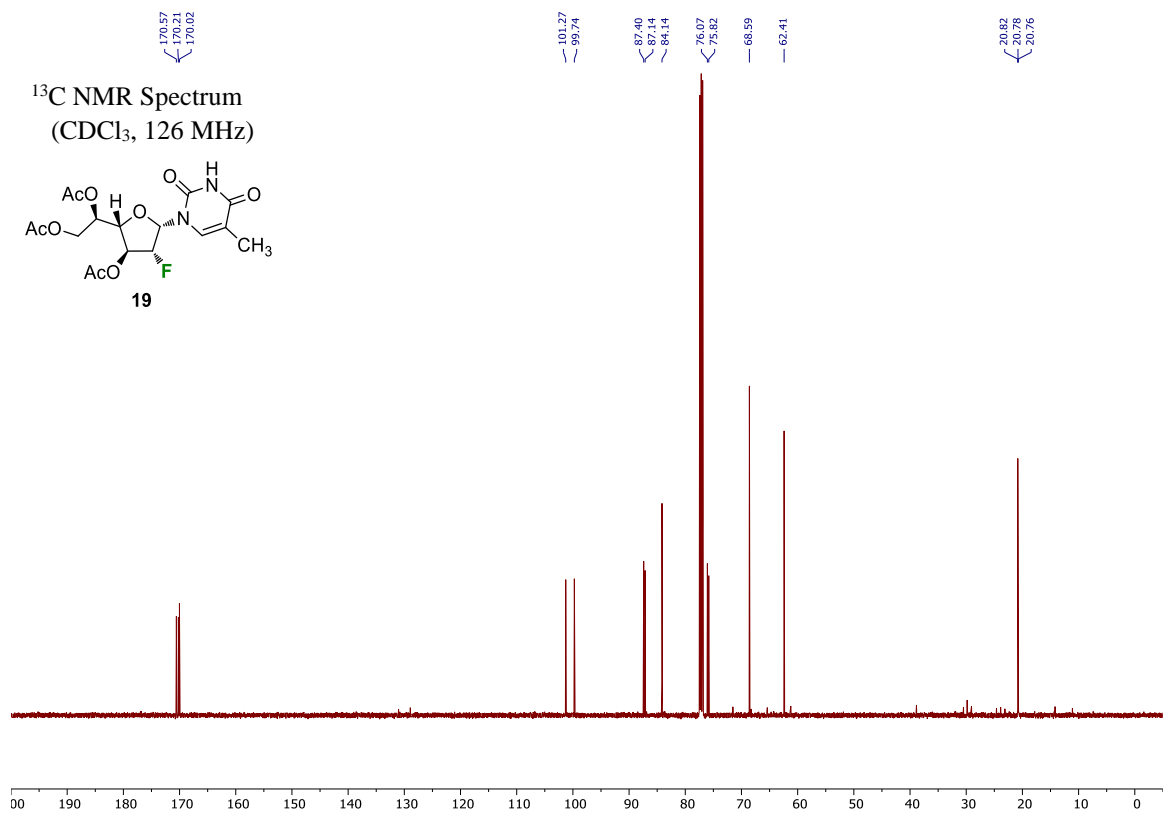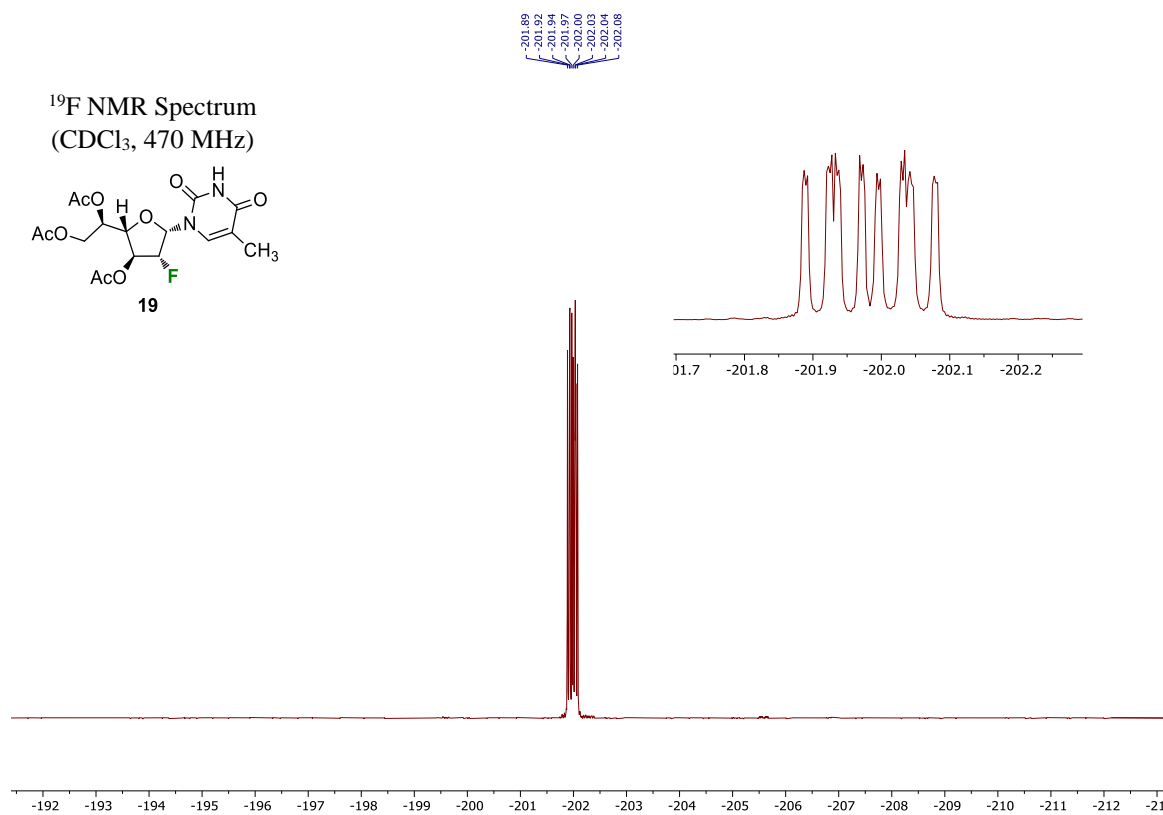

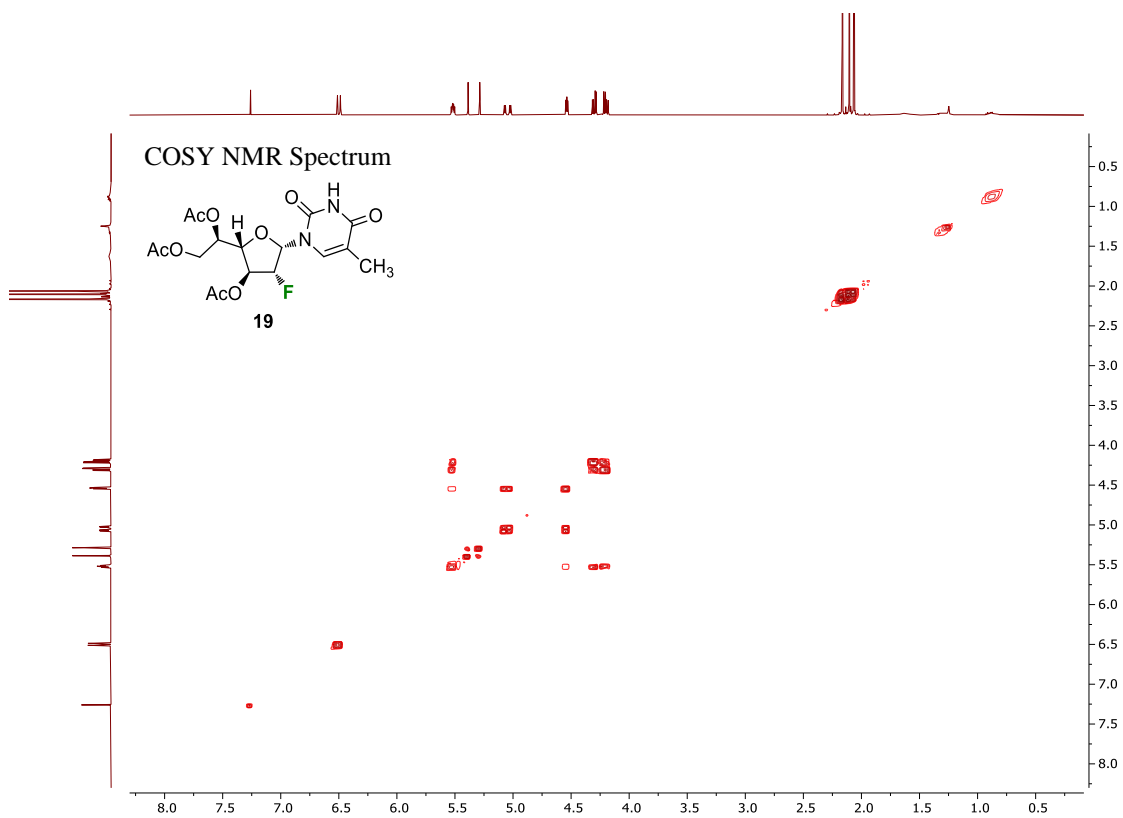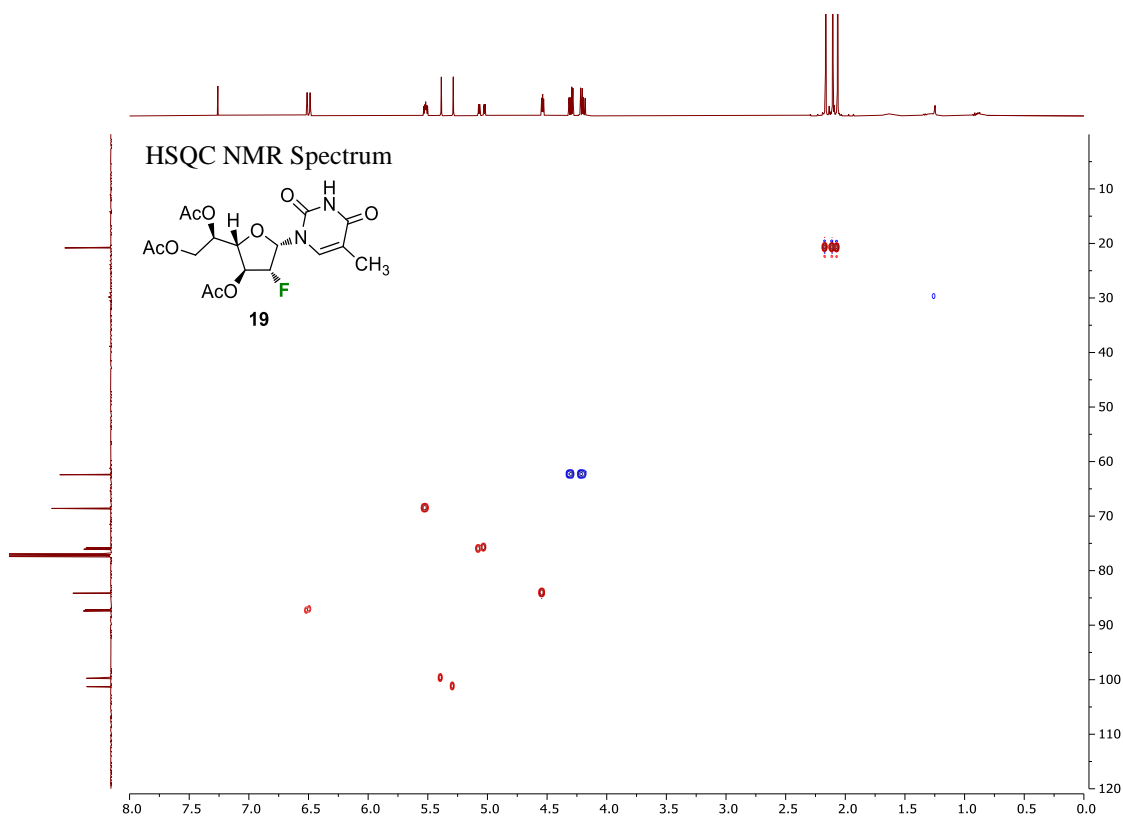

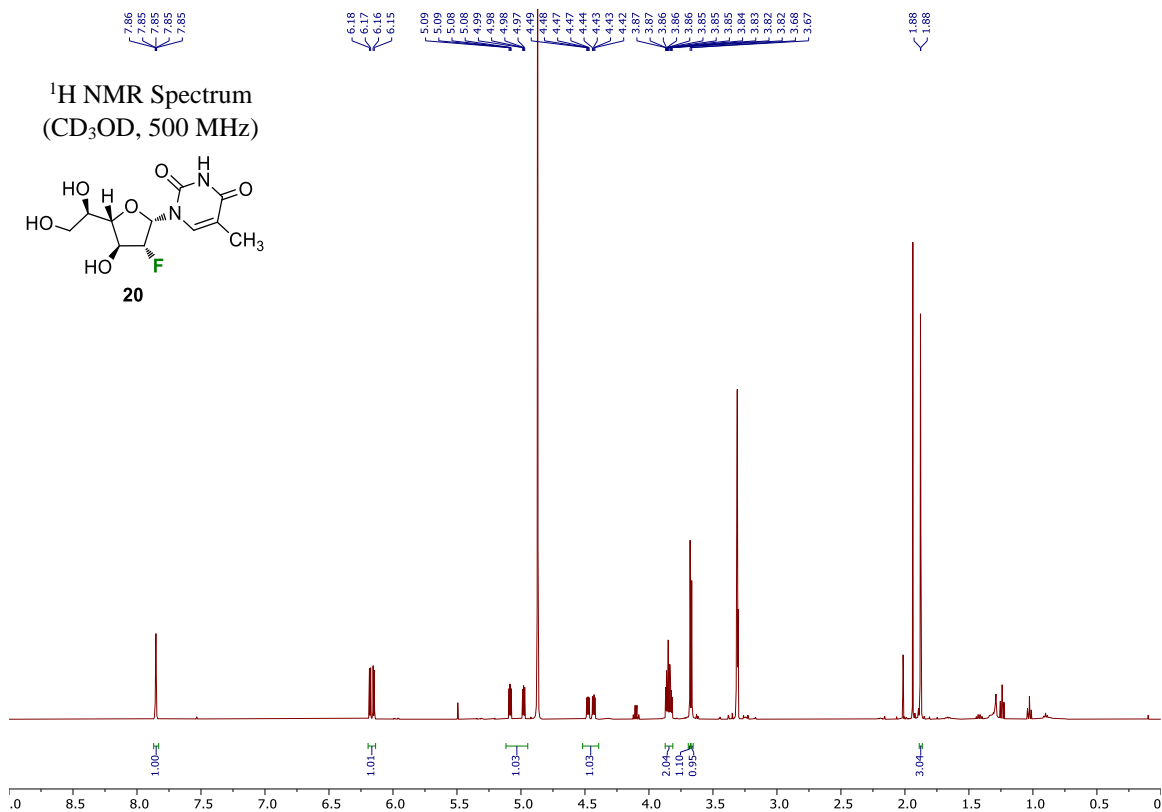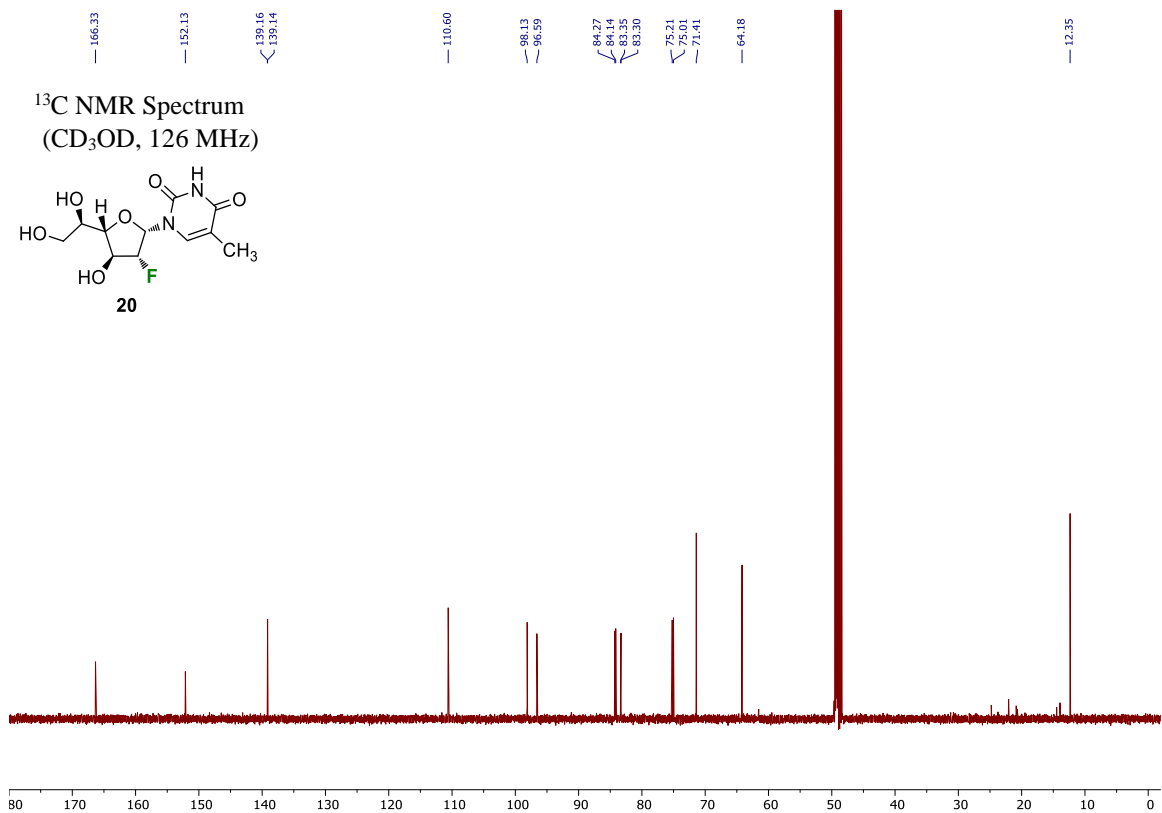

<sup>19</sup>F NMR Spectrum  
(CD<sub>3</sub>OD, 470 MHz)

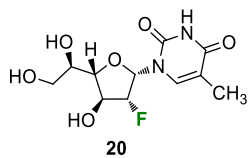

-200.39  
-200.43  
-200.44  
-200.47  
-200.51  
-200.54  
-200.56  
-200.59

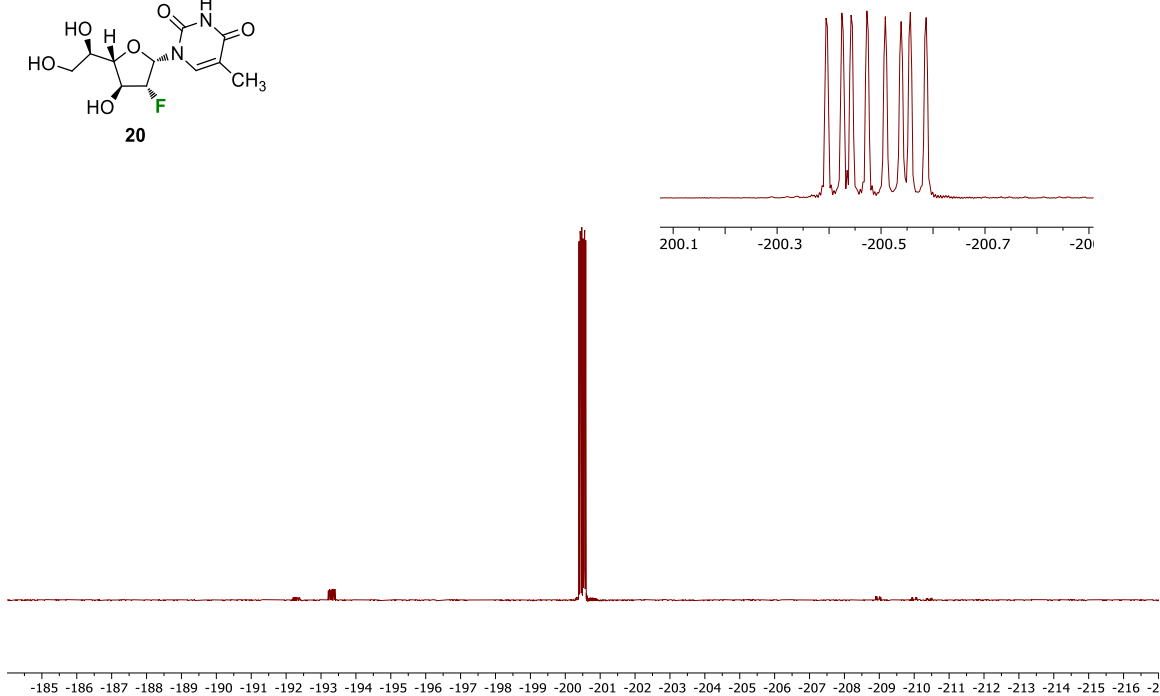

COSY NMR Spectrum

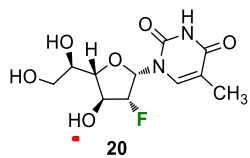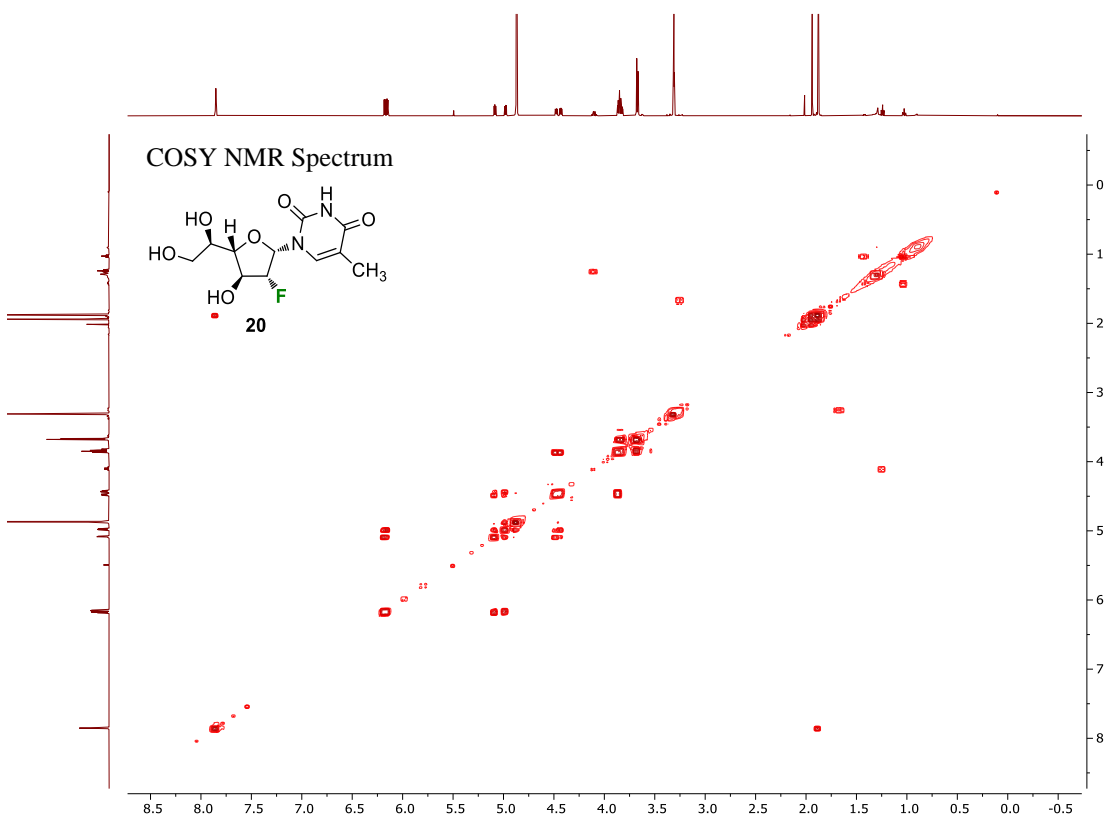

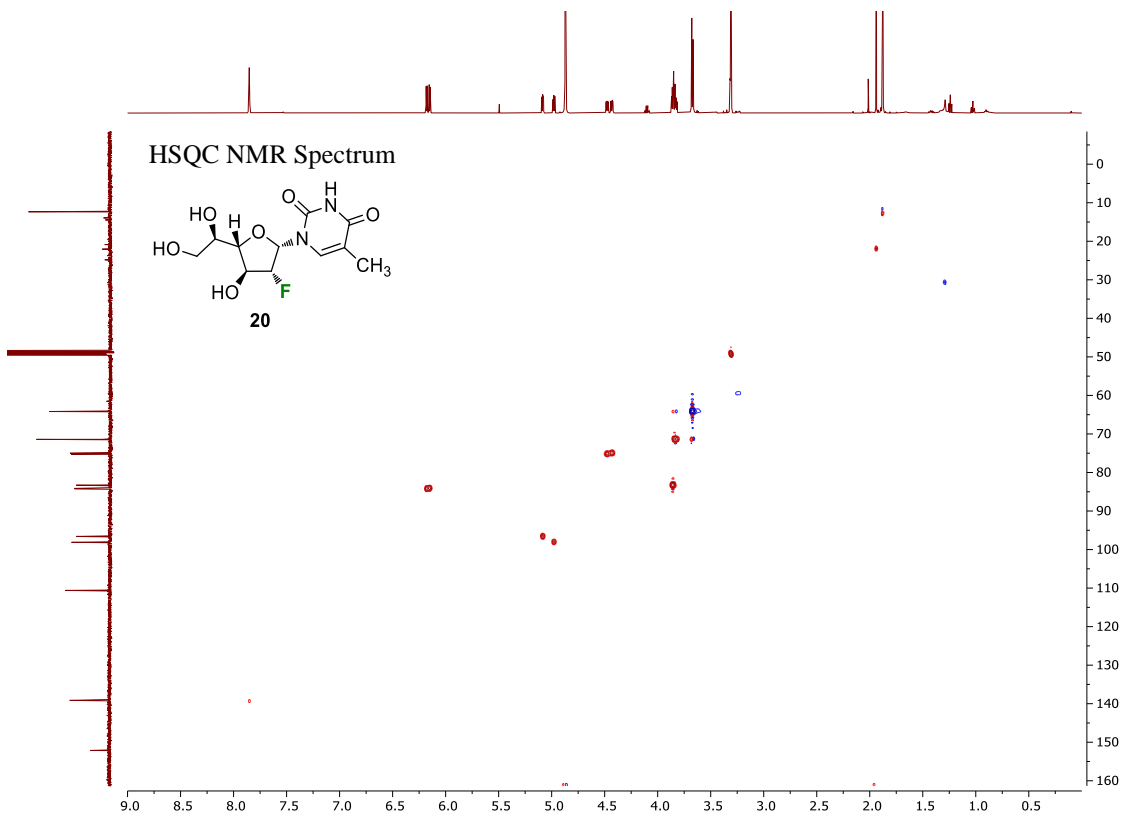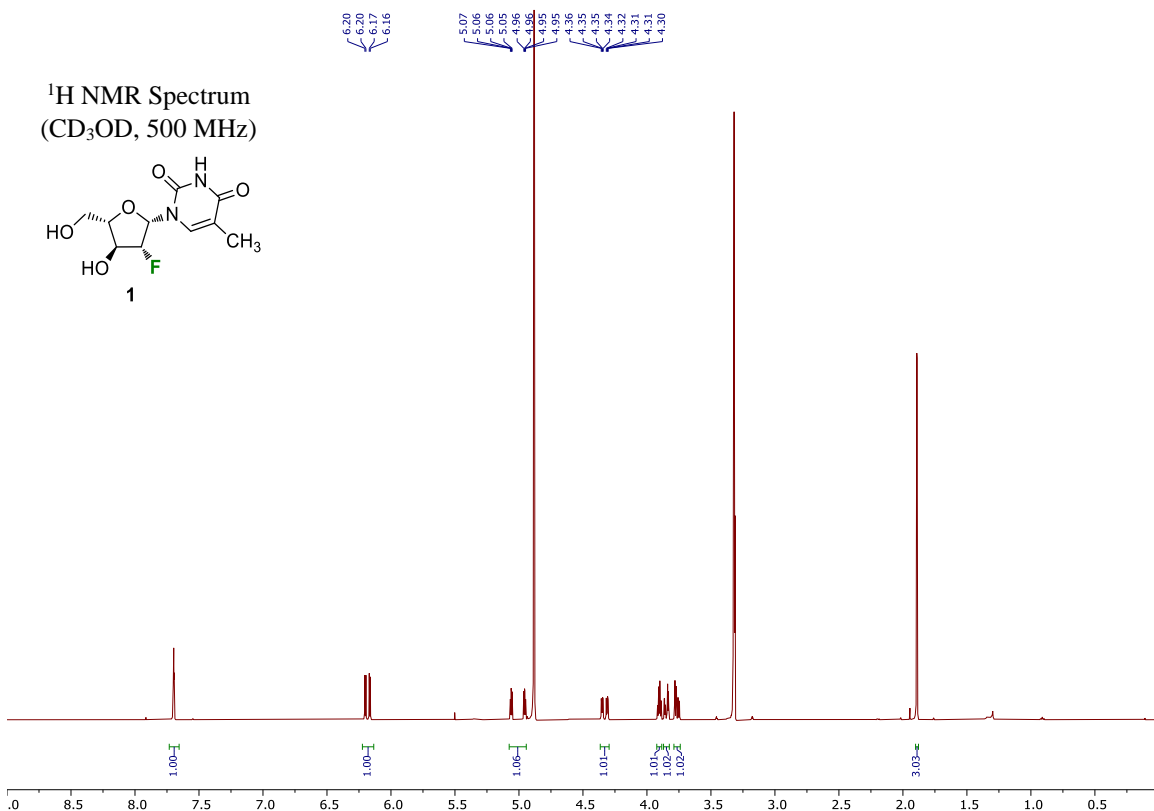

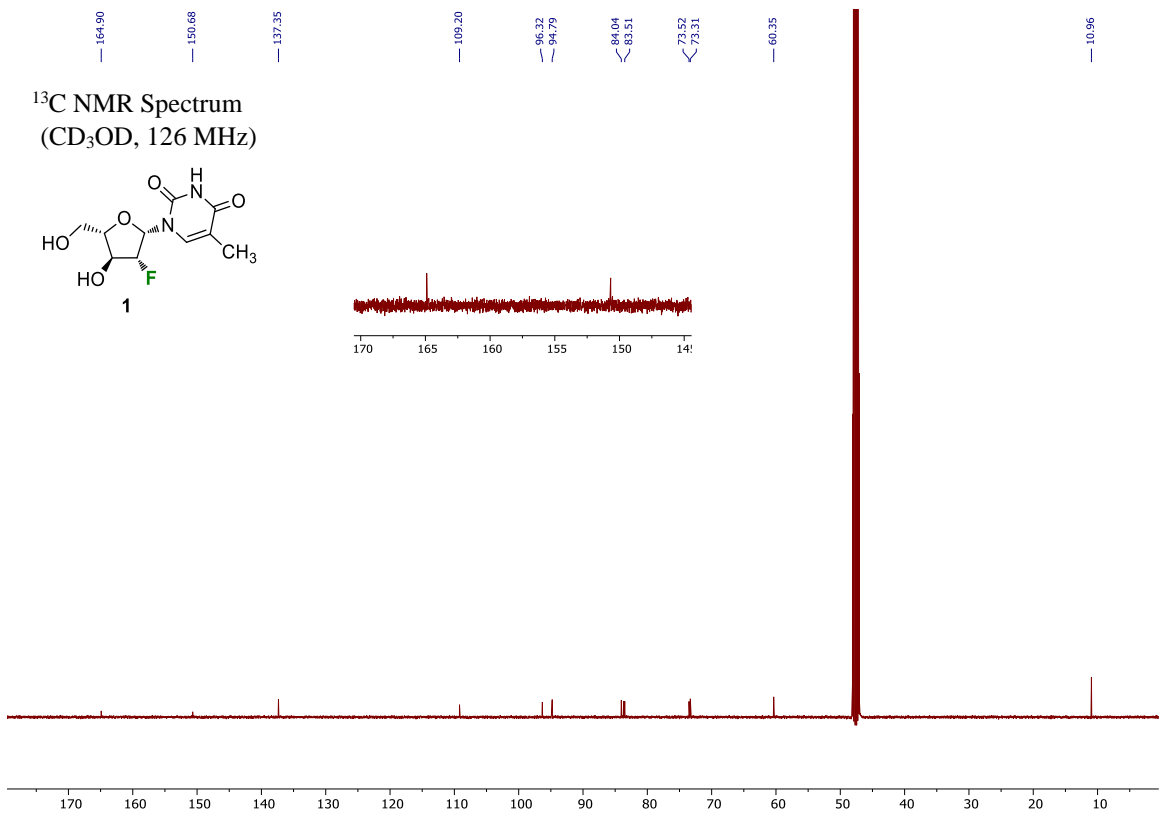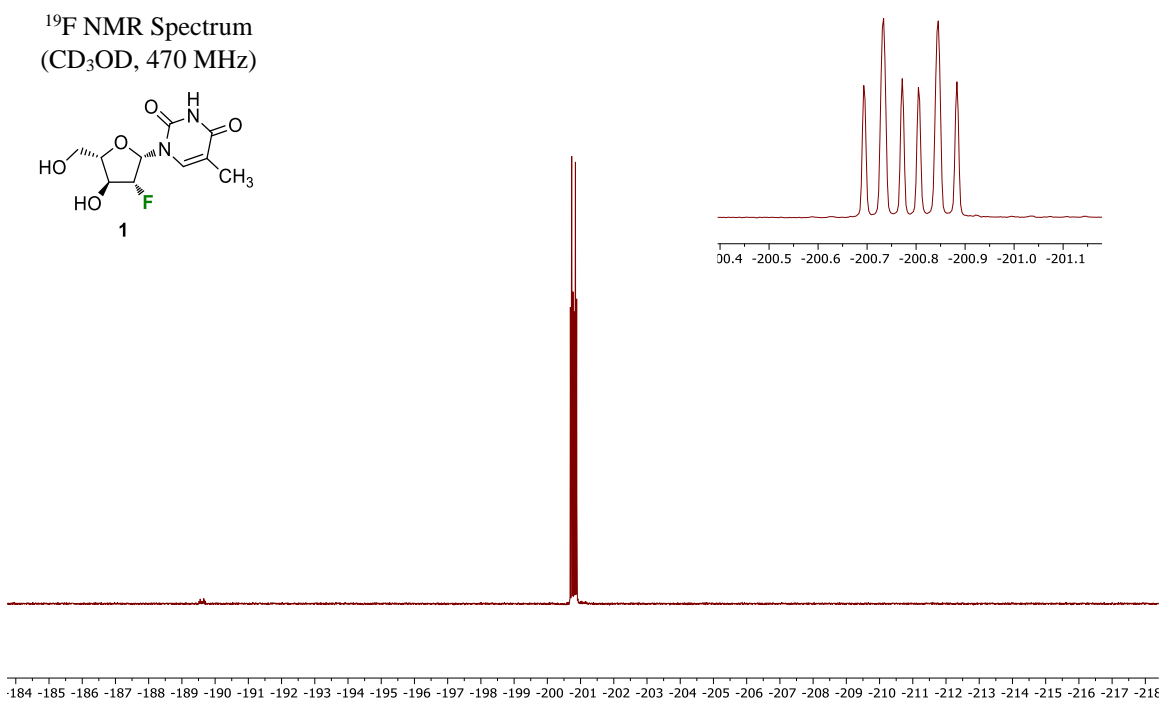

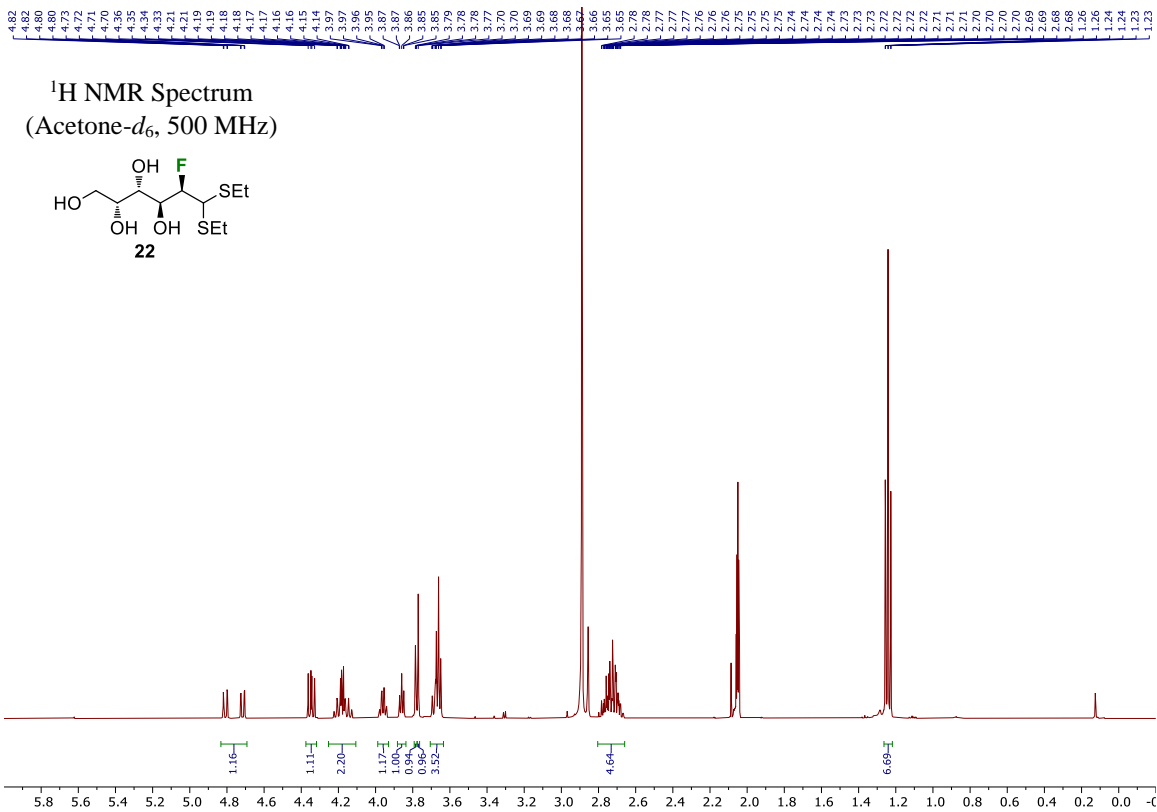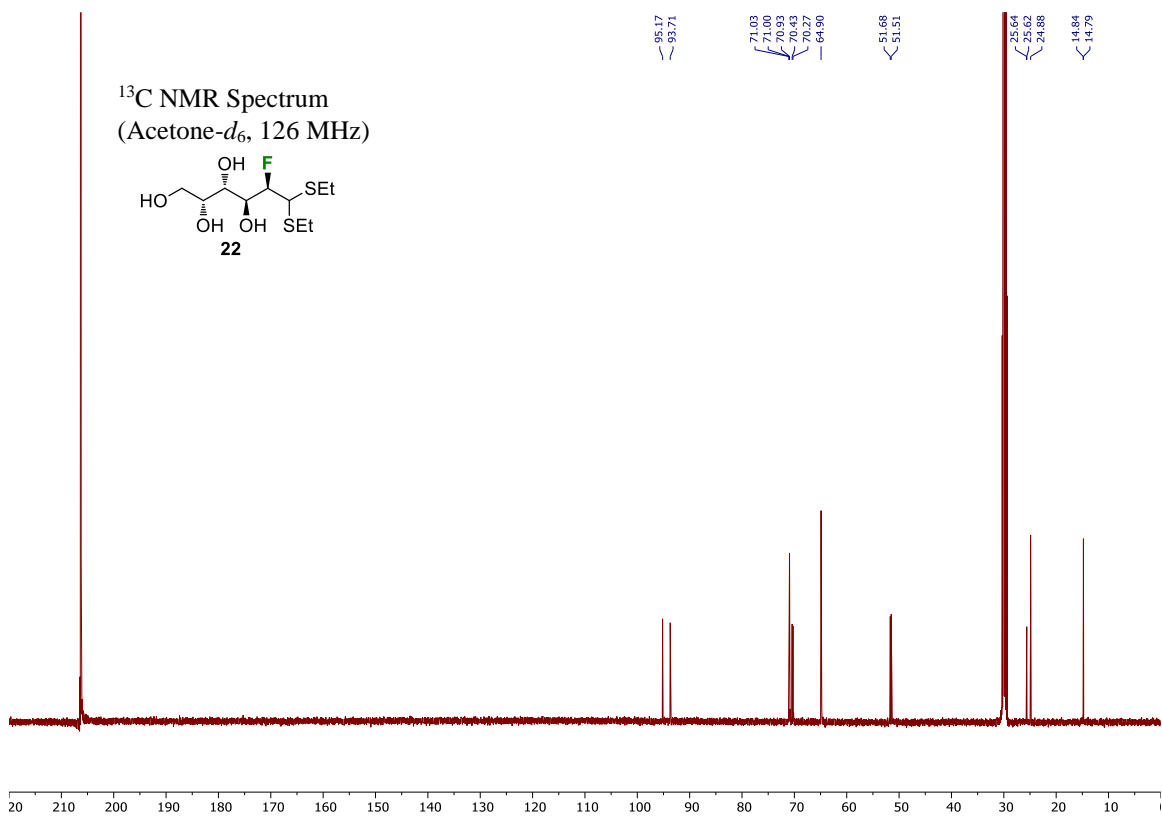

<sup>19</sup>F NMR Spectrum  
(Acetone-*d*<sub>6</sub>, 470 MHz)

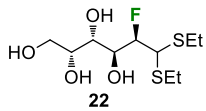

-195.72  
-195.72  
-195.75  
-195.76  
-195.78  
-195.80  
-195.82  
-195.84  
-195.86  
-195.88  
-195.90  
-195.92

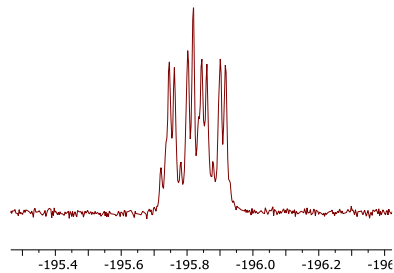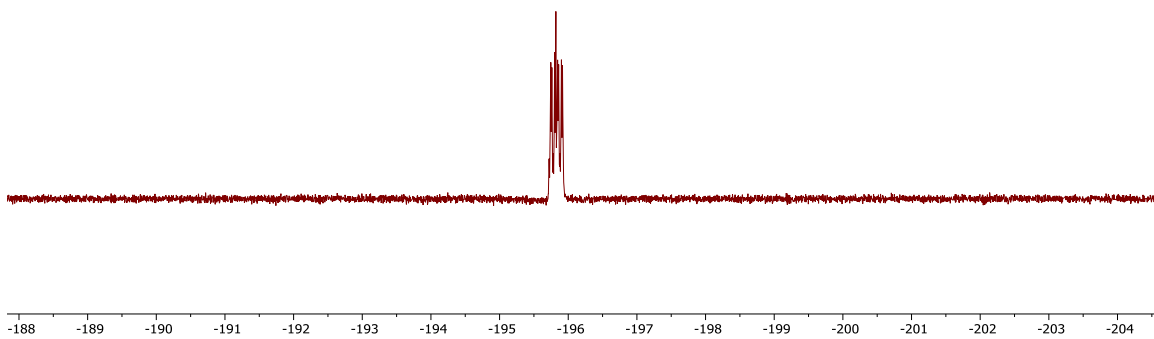

COSY NMR Spectrum

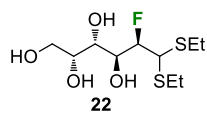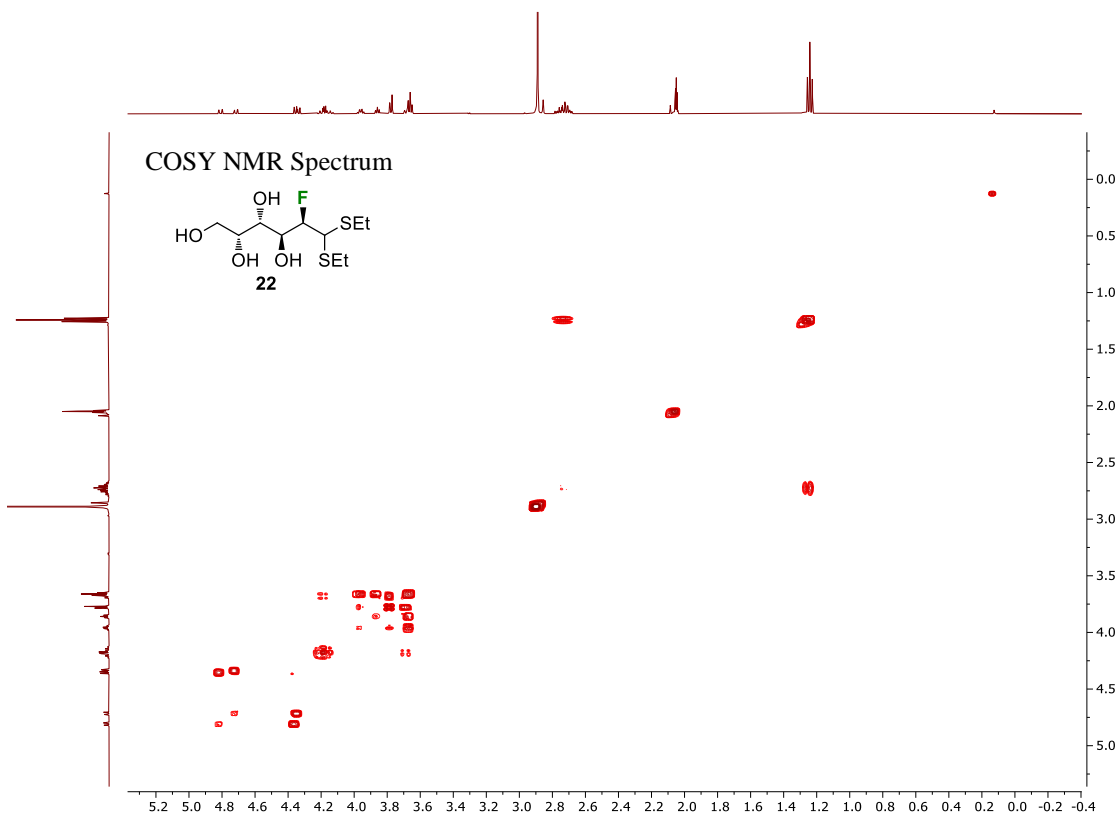



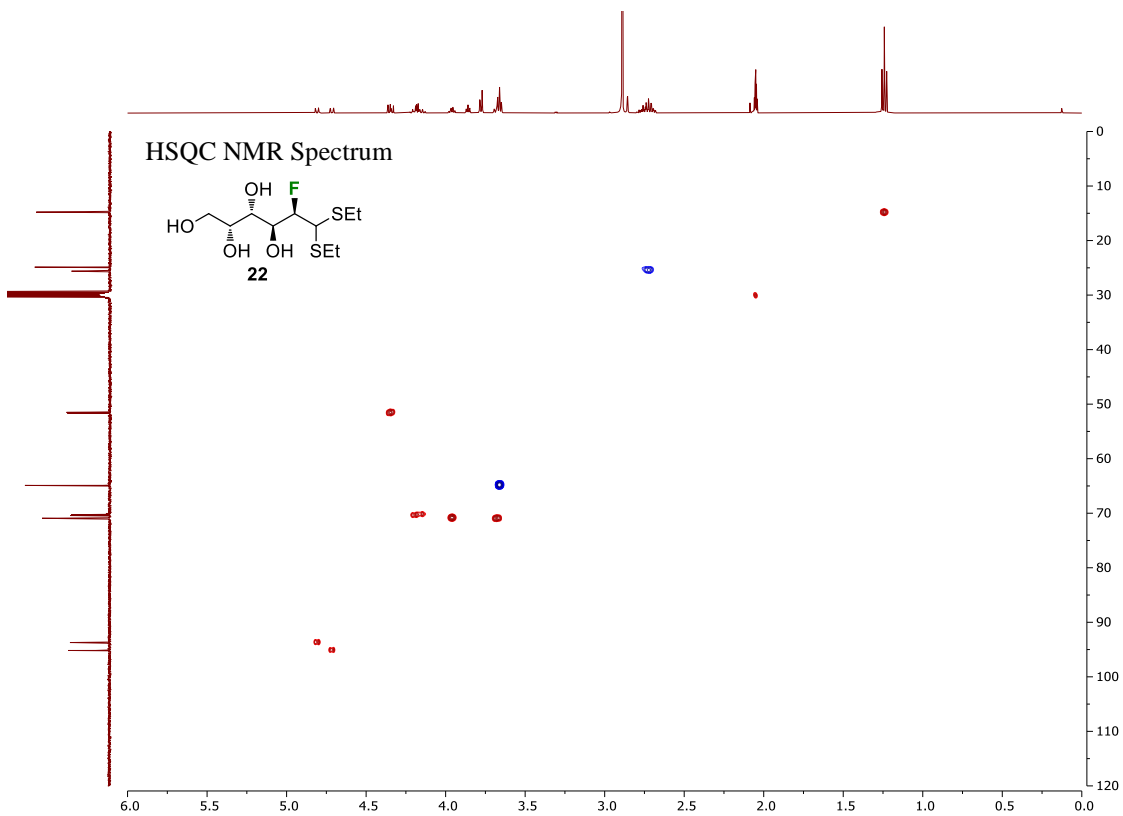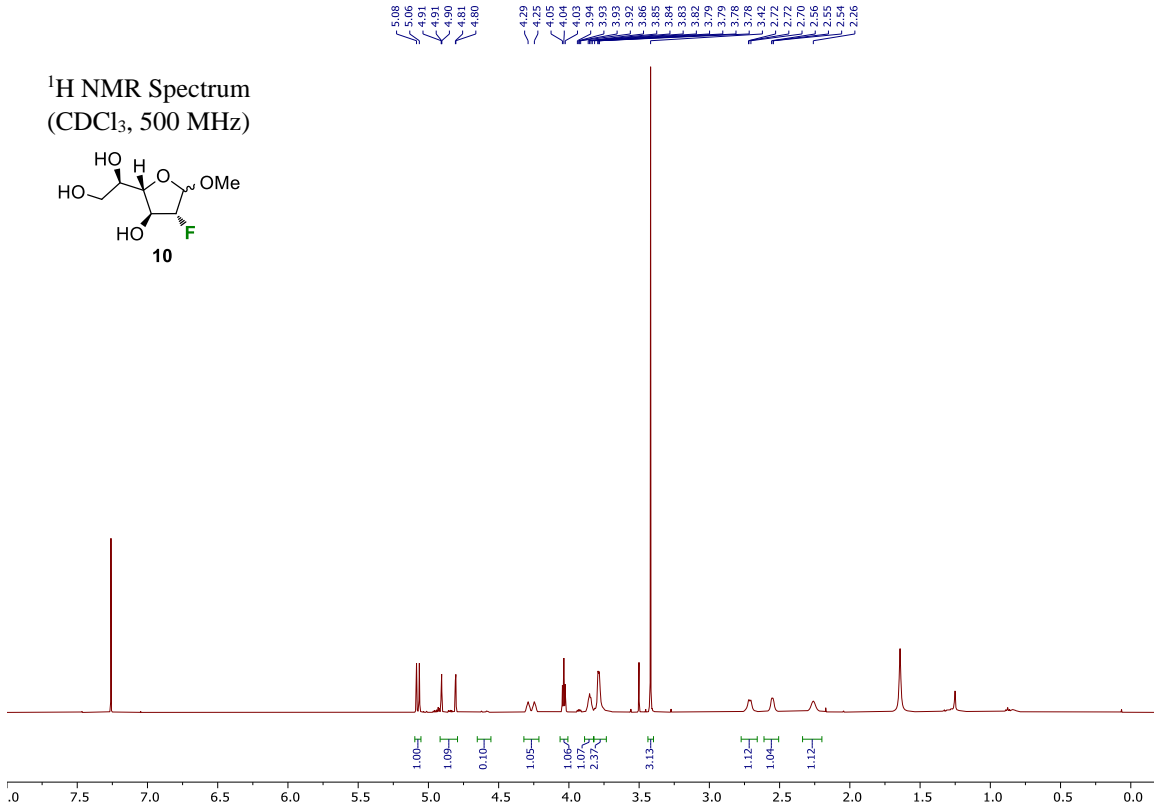

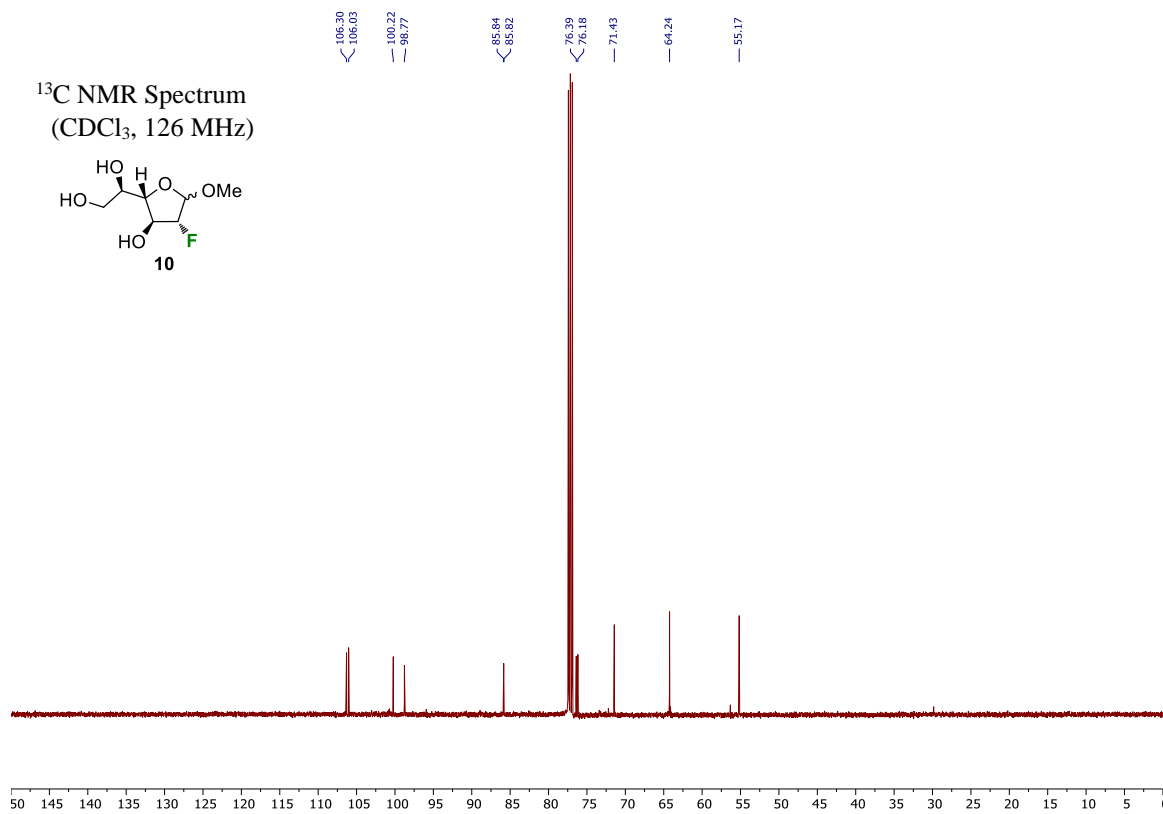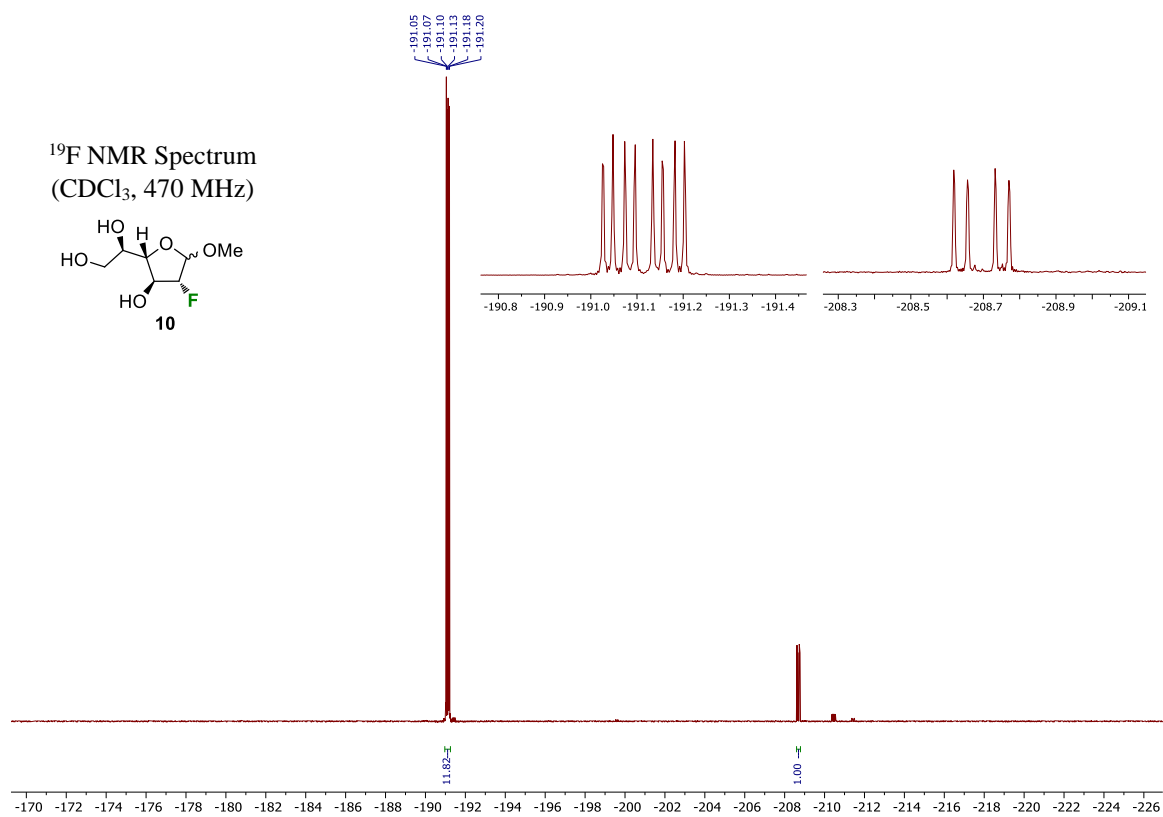

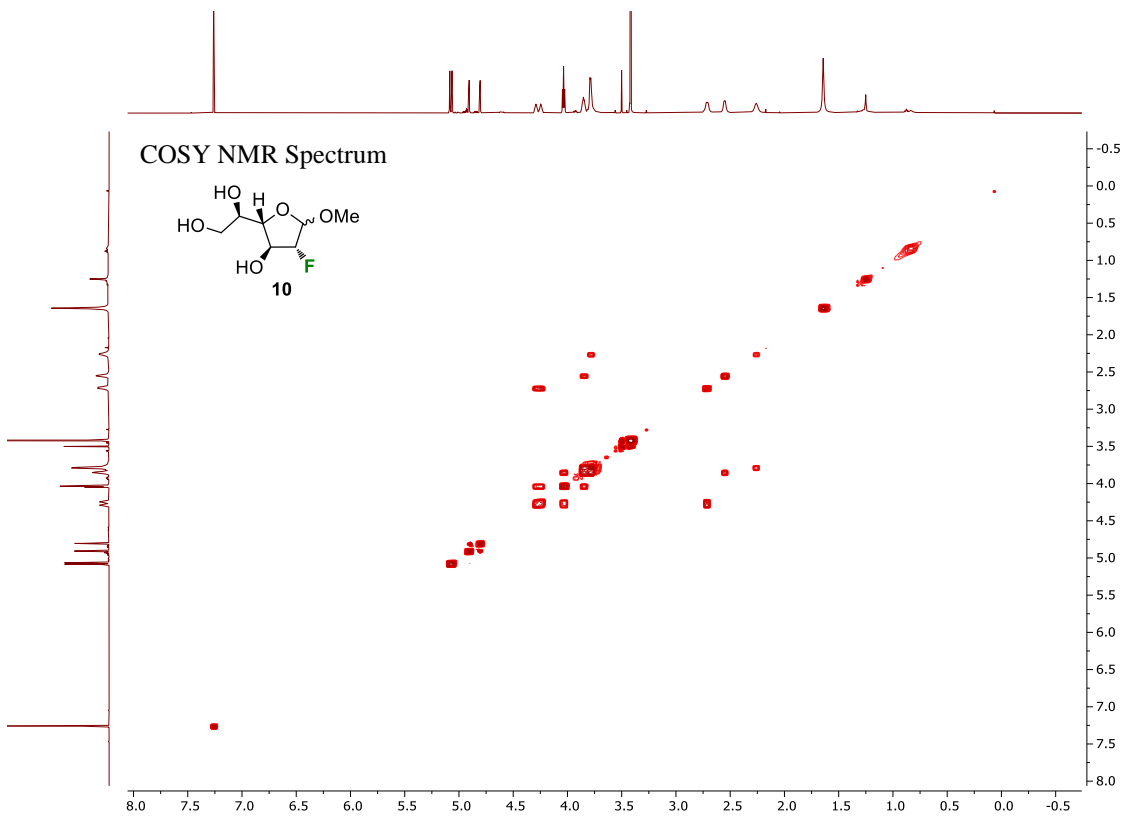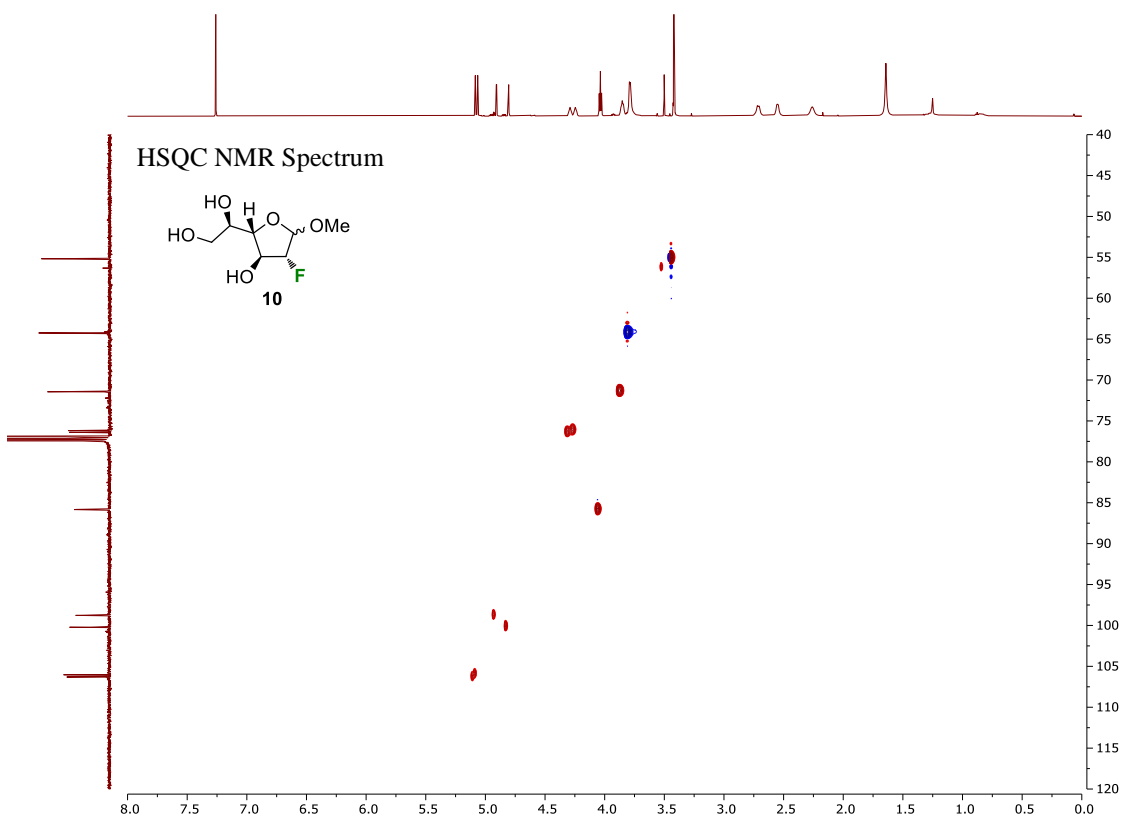

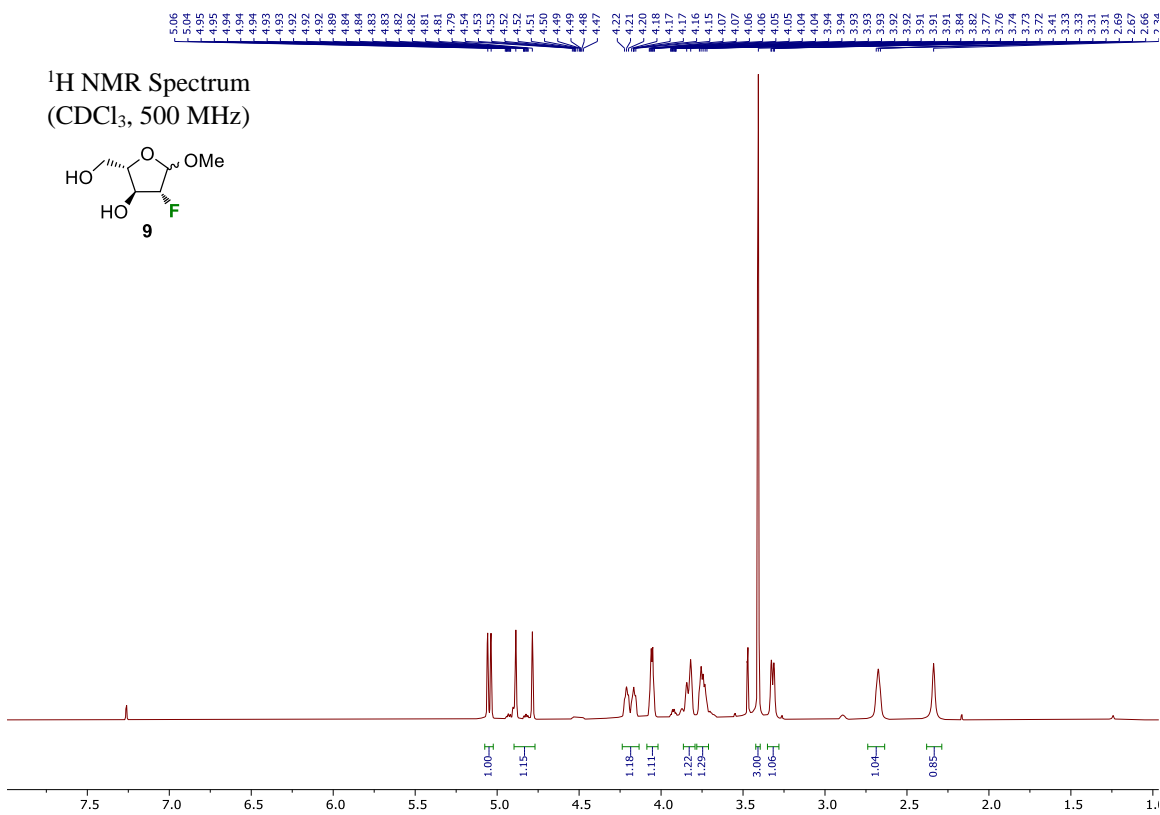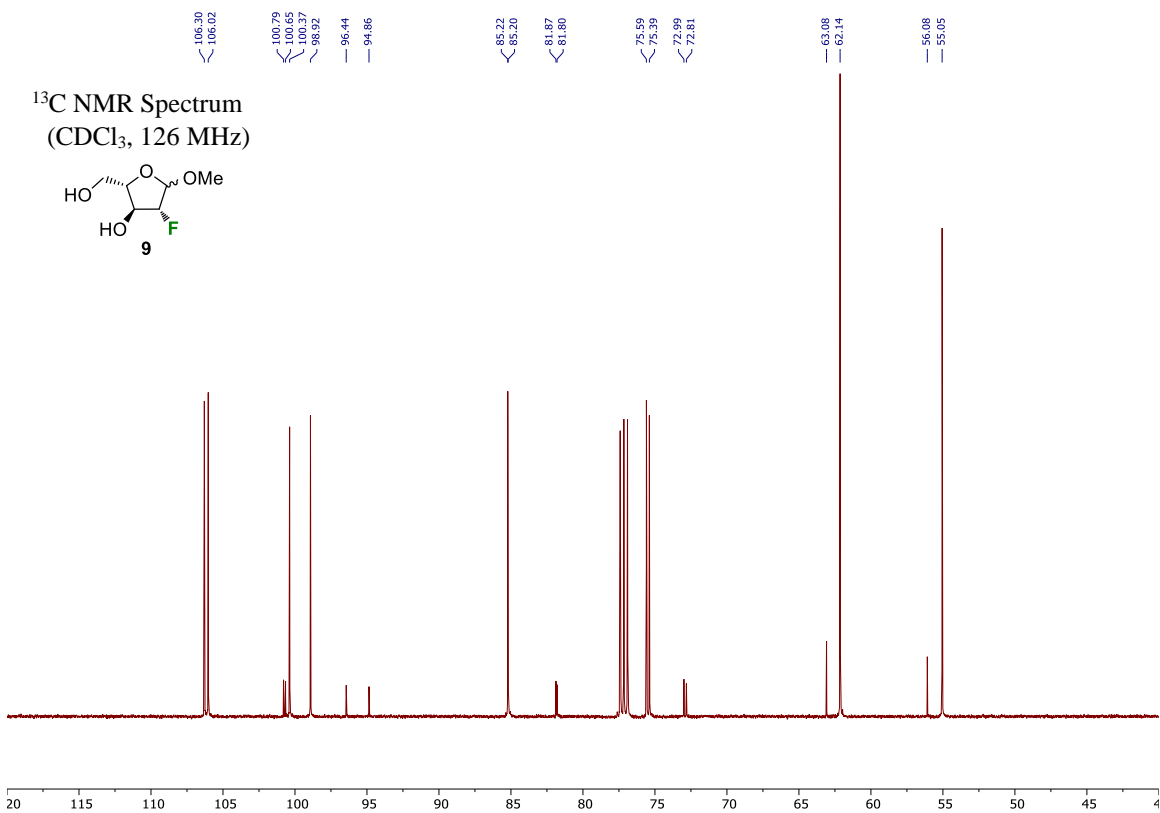

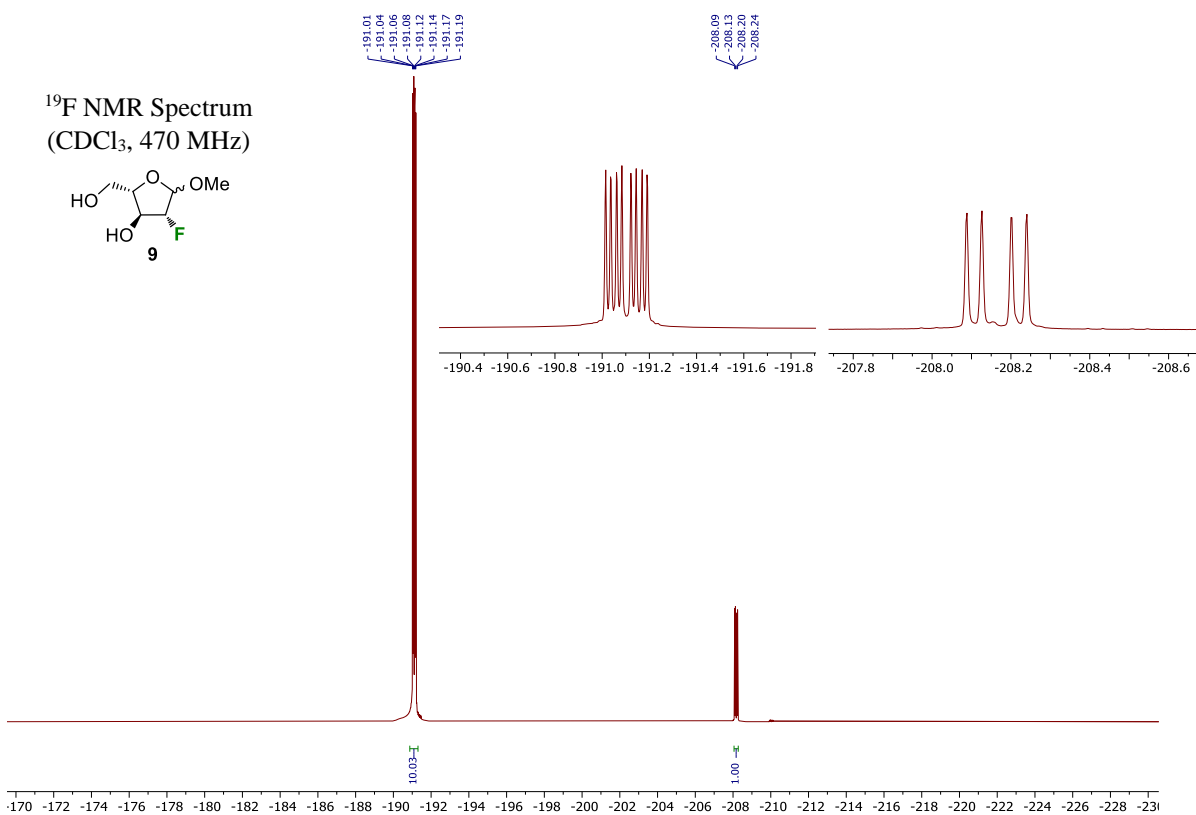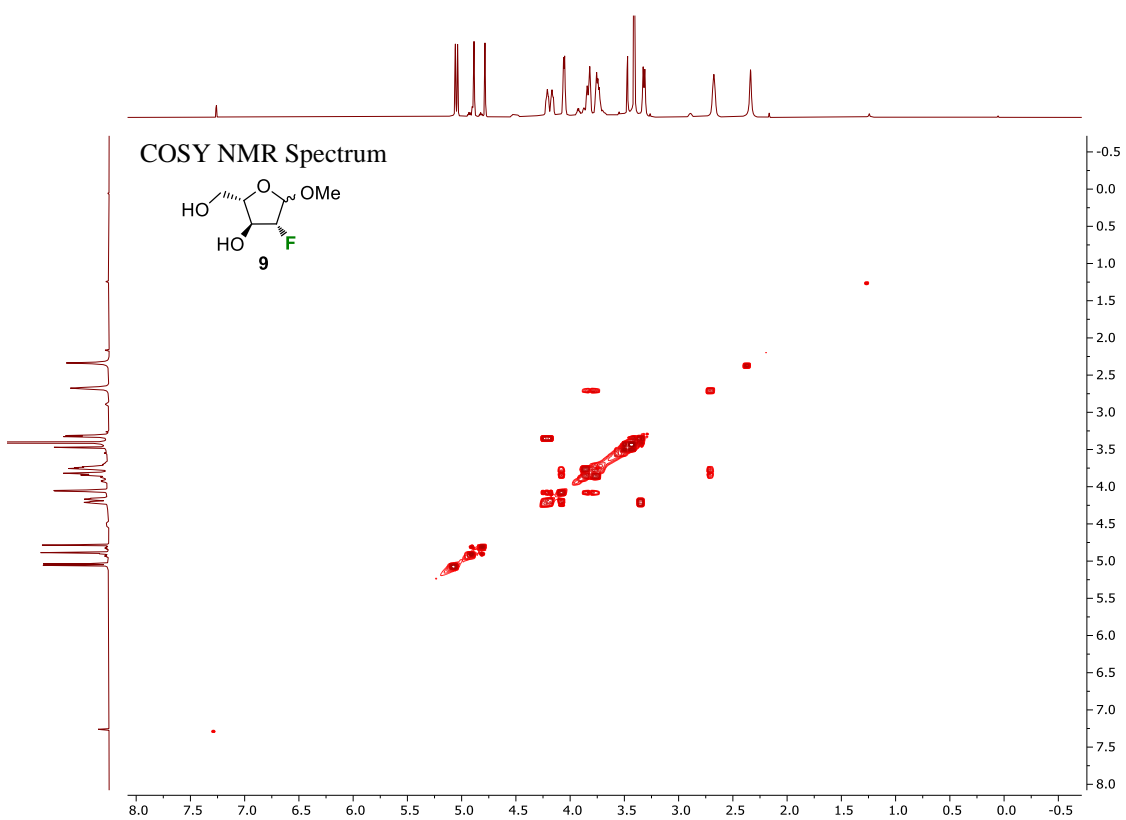

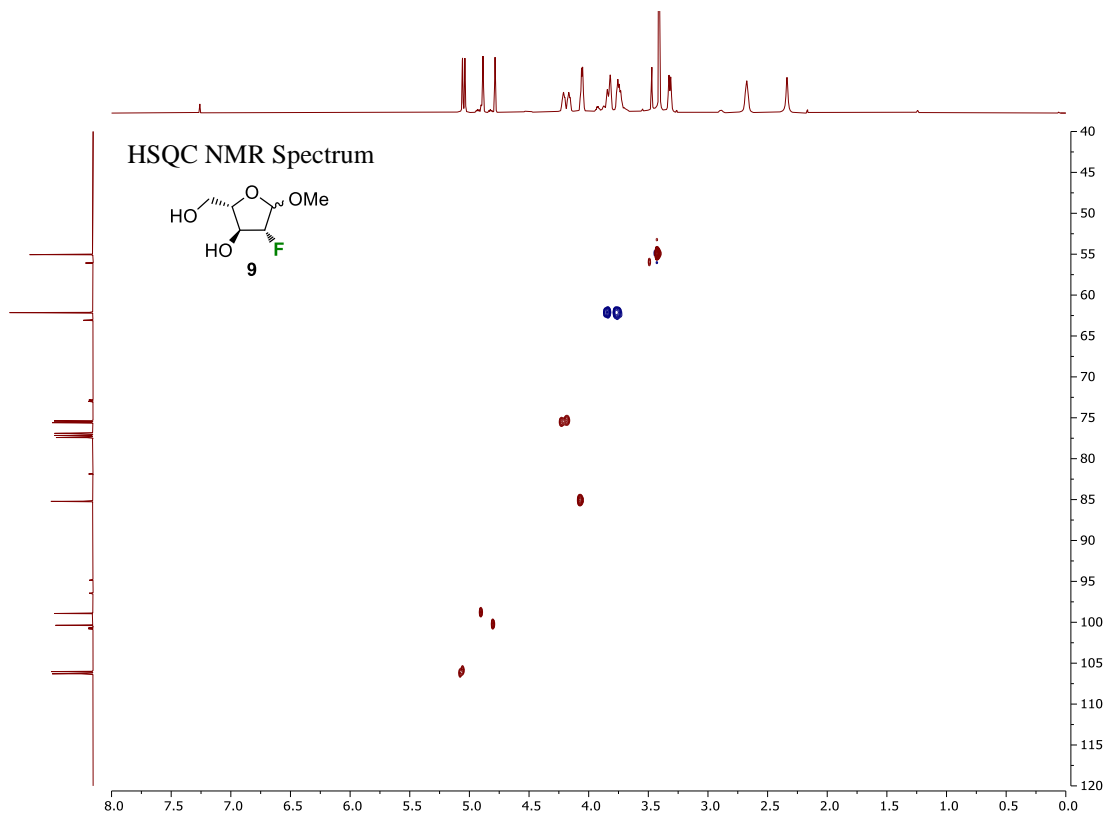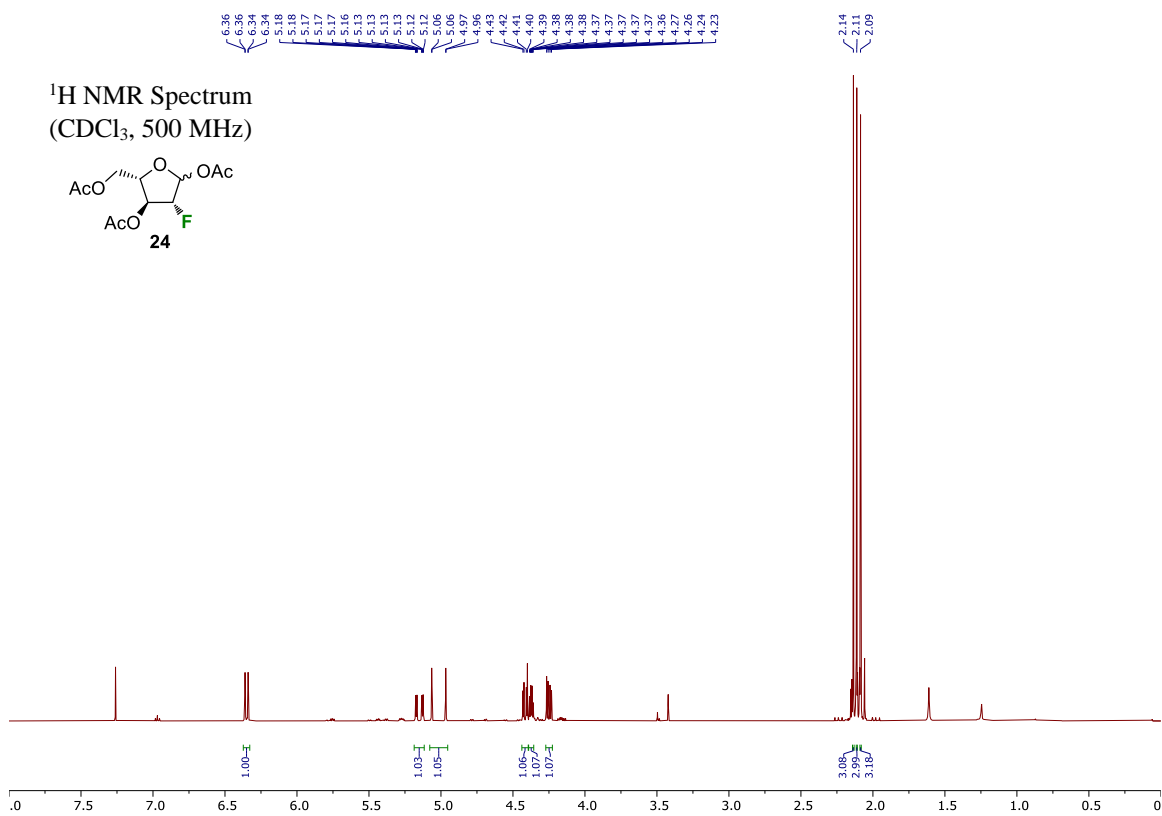

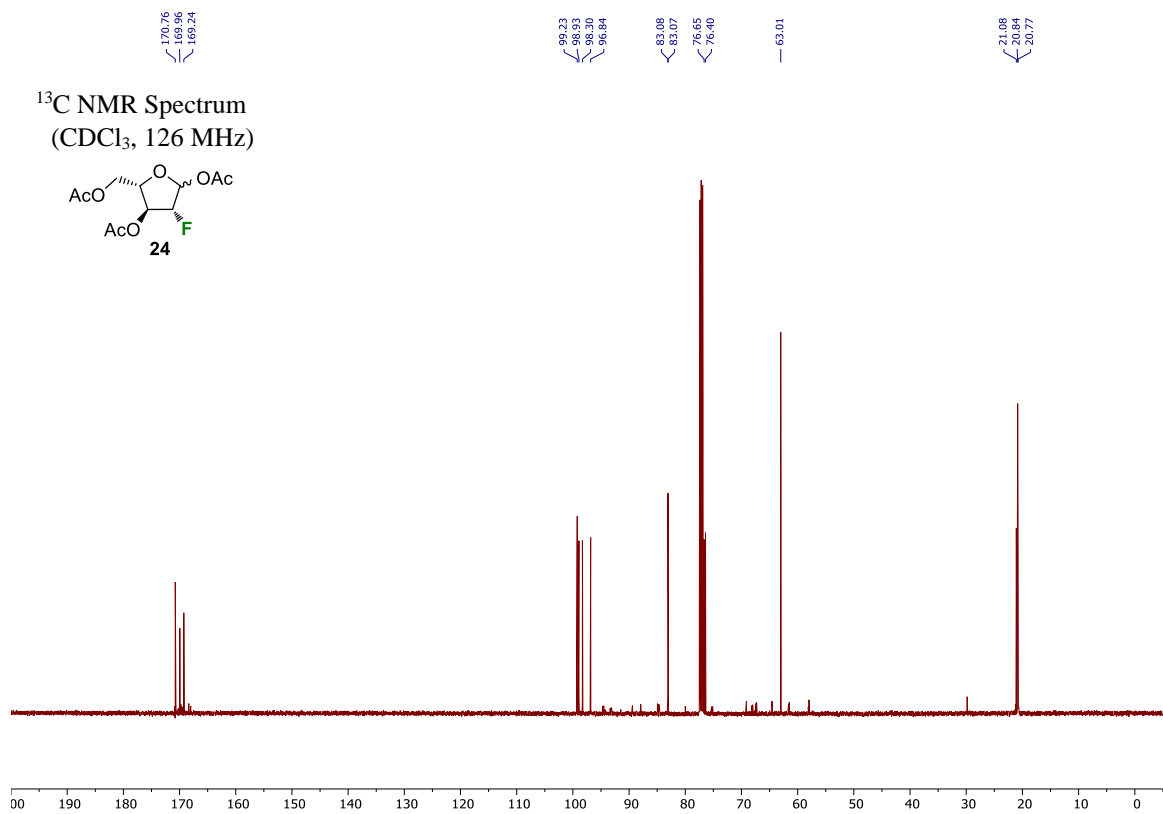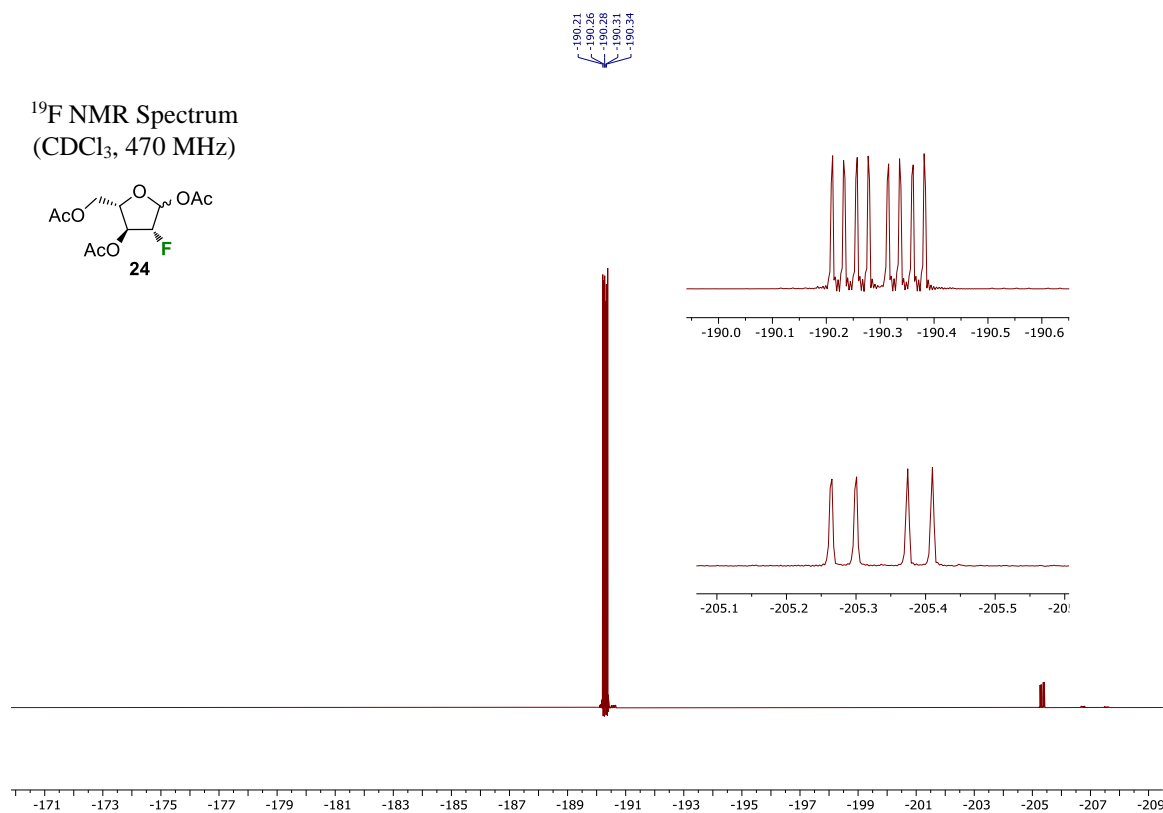

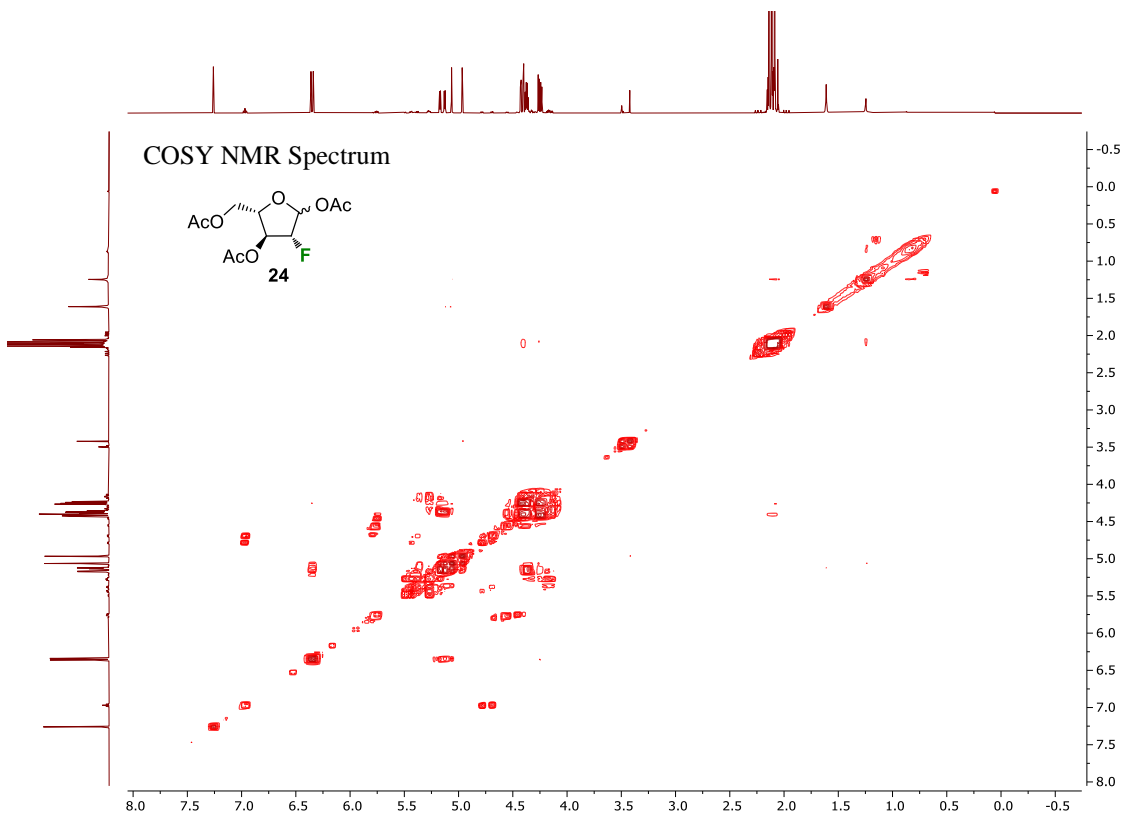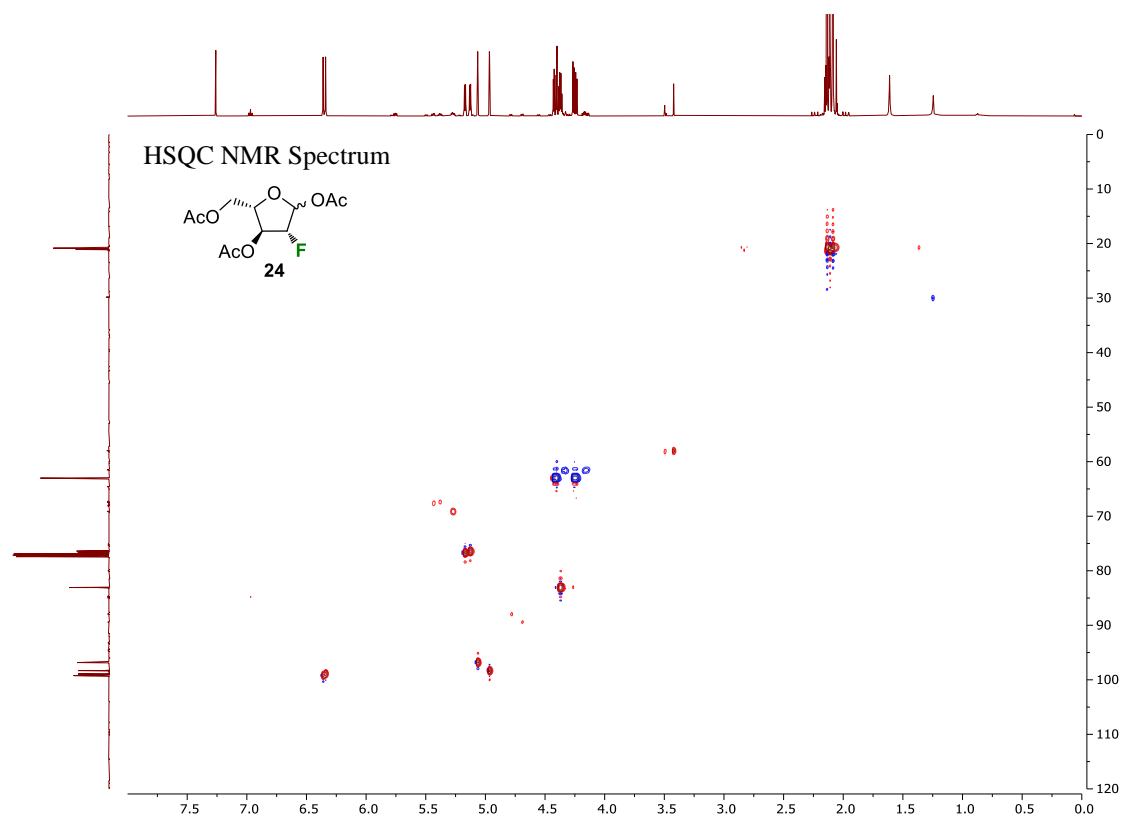





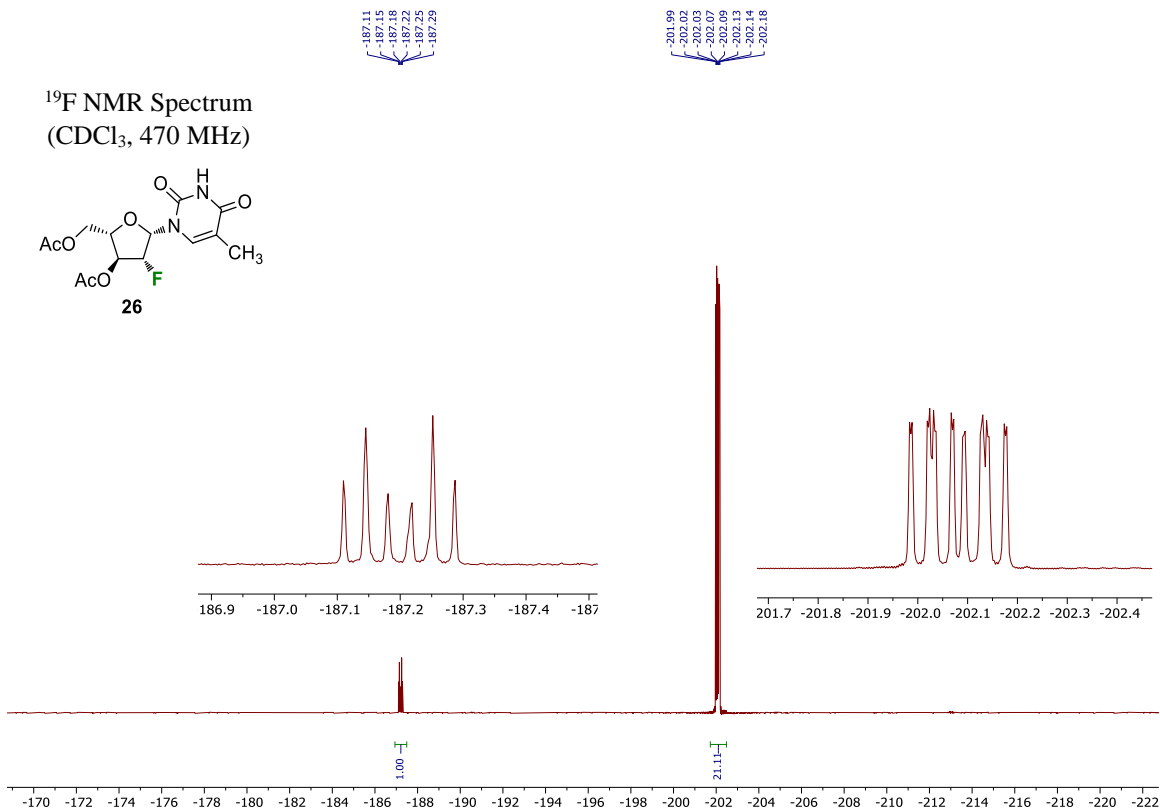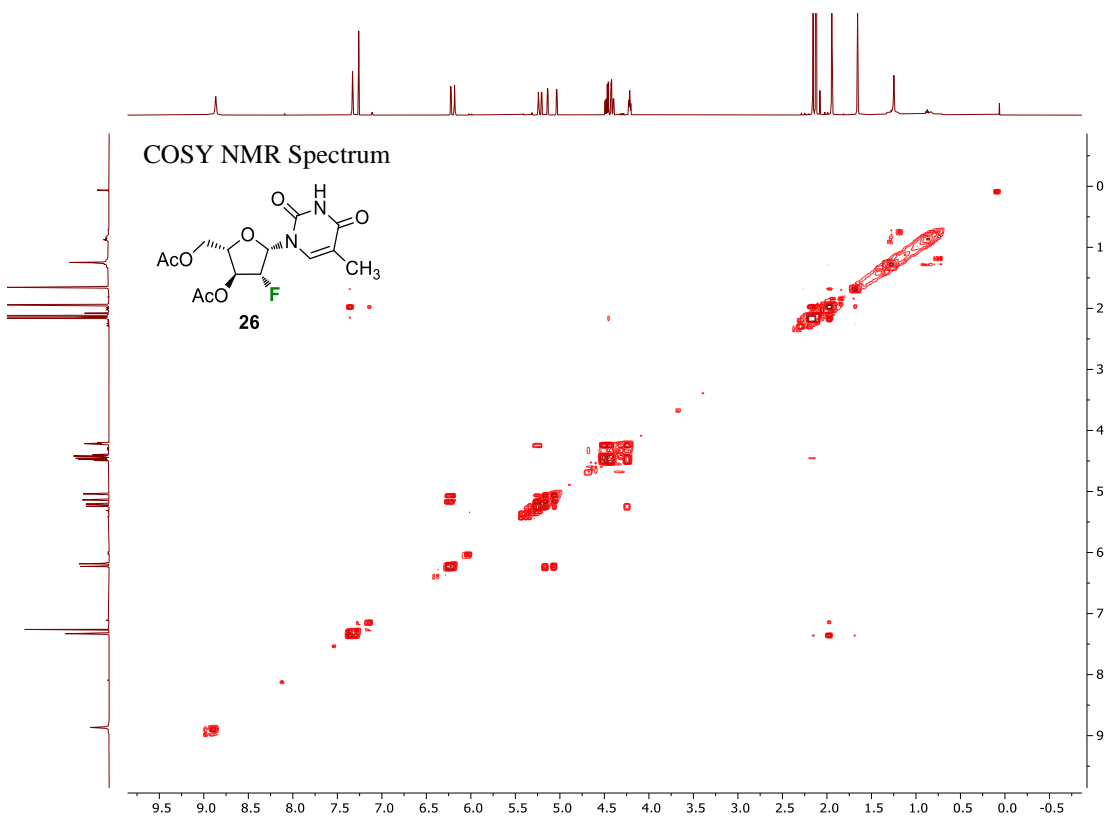

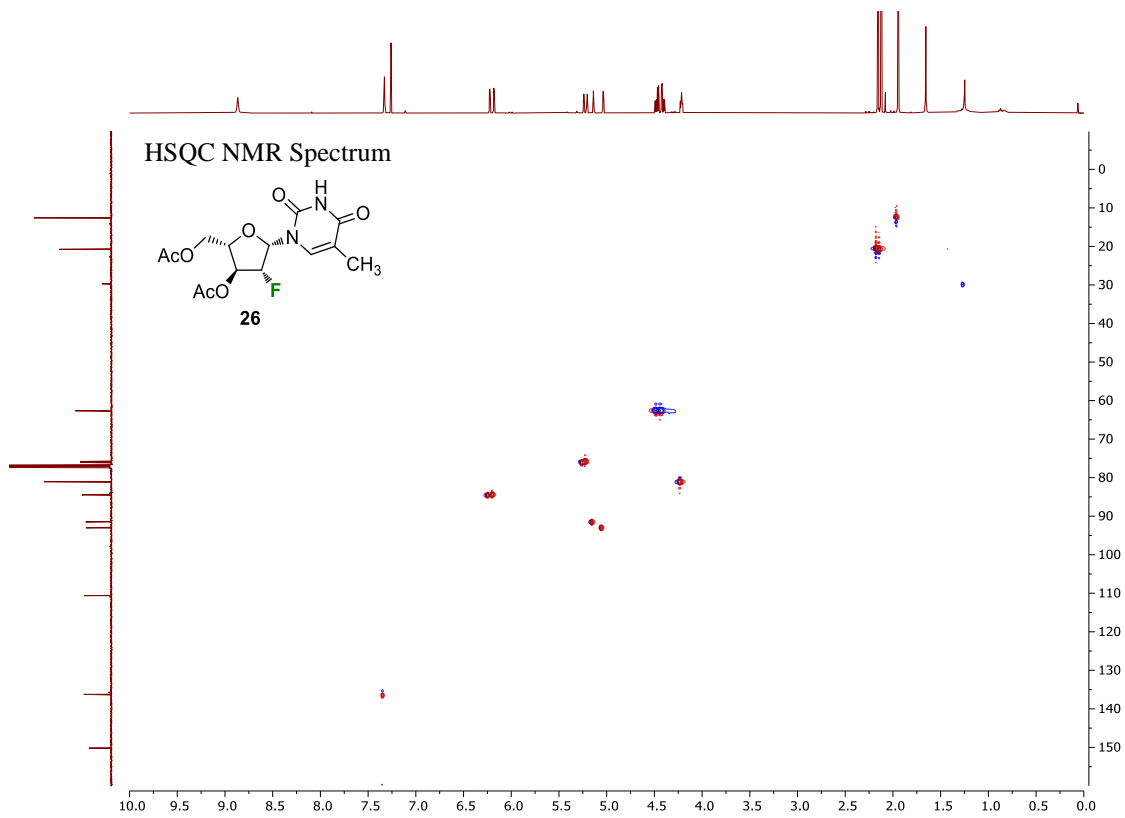

### III. References

---

<sup>1</sup> Q. Zhang and H.-w. Liu, *J. Am. Chem. Soc.* 2001, **123**, 6756–6766.

<sup>2</sup> G. G. Sivets, *Tetrahedron* 2018, **74**, 920–931.
